# Supplementary material for: Functional cis-regulatory modules encoded by mouse-specific endogenous retrovirus
Source: PubMed Central journal article supplement (PMC5379053; doi:10.1038/ncomms14550), 2017-03-28
Supplement: ncomms14550-s1.pdf [file ncomms14550-s1.pdf]

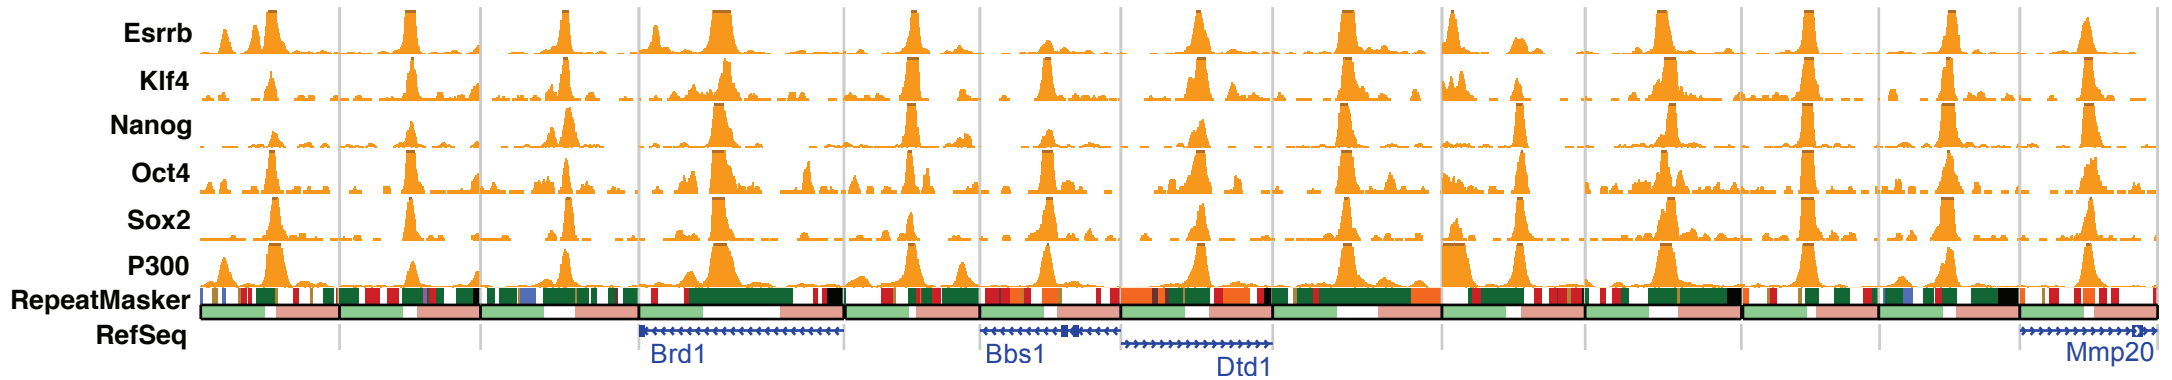

**Supplementary Figure 1:** Gene-set view (WashU Epigenome Browser - <http://epigenomegateway.wustl.edu/browser>) of 13 TEs that are bound by two or more TFs (yellow tracks: normalized read density of CHIP-seq). The view is centered on the TE, and shows 2.5 kb upstream (green bar) and downstream (red bar).

**A**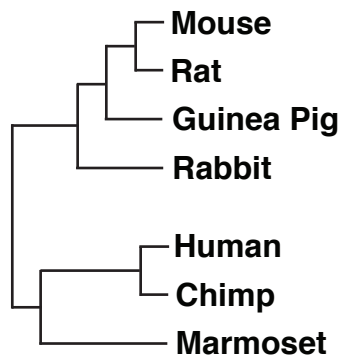**B**

|            | RLTR9A | RLTR9B2 | RLTR9D | RLTR9E | RLTR13D1 | RLTR13D6 |
|------------|--------|---------|--------|--------|----------|----------|
| Mouse      | ✓      | ✓       | ✓      | ✓      | ✓        | ✓        |
| Rat        | ✗      | ✗       | ✗      | ✗      | ✗        | ✗        |
| Guinea Pig | ✗      | ✗       | ✗      | ✗      | ✗        | ✗        |
| Rabbit     | ✗      | ✗       | ✗      | ✗      | ✗        | ✗        |
| Human      | ✗      | ✗       | ✗      | ✗      | ✗        | ✗        |
| Chimp      | ✗      | ✗       | ✗      | ✗      | ✗        | ✗        |
| Marmoset   | ✗      | ✗       | ✗      | ✗      | ✗        | ✗        |

**Supplementary Figure 2:** (A) Identifying in which species the six TE subfamilies that contain multiple TFs' binding sites exist. To do this, we used BLAST (Altschul SF, J Mol Biol, 1990) to search for the presence of each TE's RepBase-consensus sequence (Jurka J, Curr Opin Struct Biol, 1998) in the genomes of various species in the vertebrate phylogenetic tree. (B) We tabulated the results of the BLAST-search for the six TE subfamilies (columns) in the seven vertebrate species (rows). Tick-marks represent the present of the sequence in the genome, while cross-marks represent the absence of the sequence in the genome. Surprisingly, we only found the sequences in the mouse genome, and not in any other genome, including the closest relative, rat.

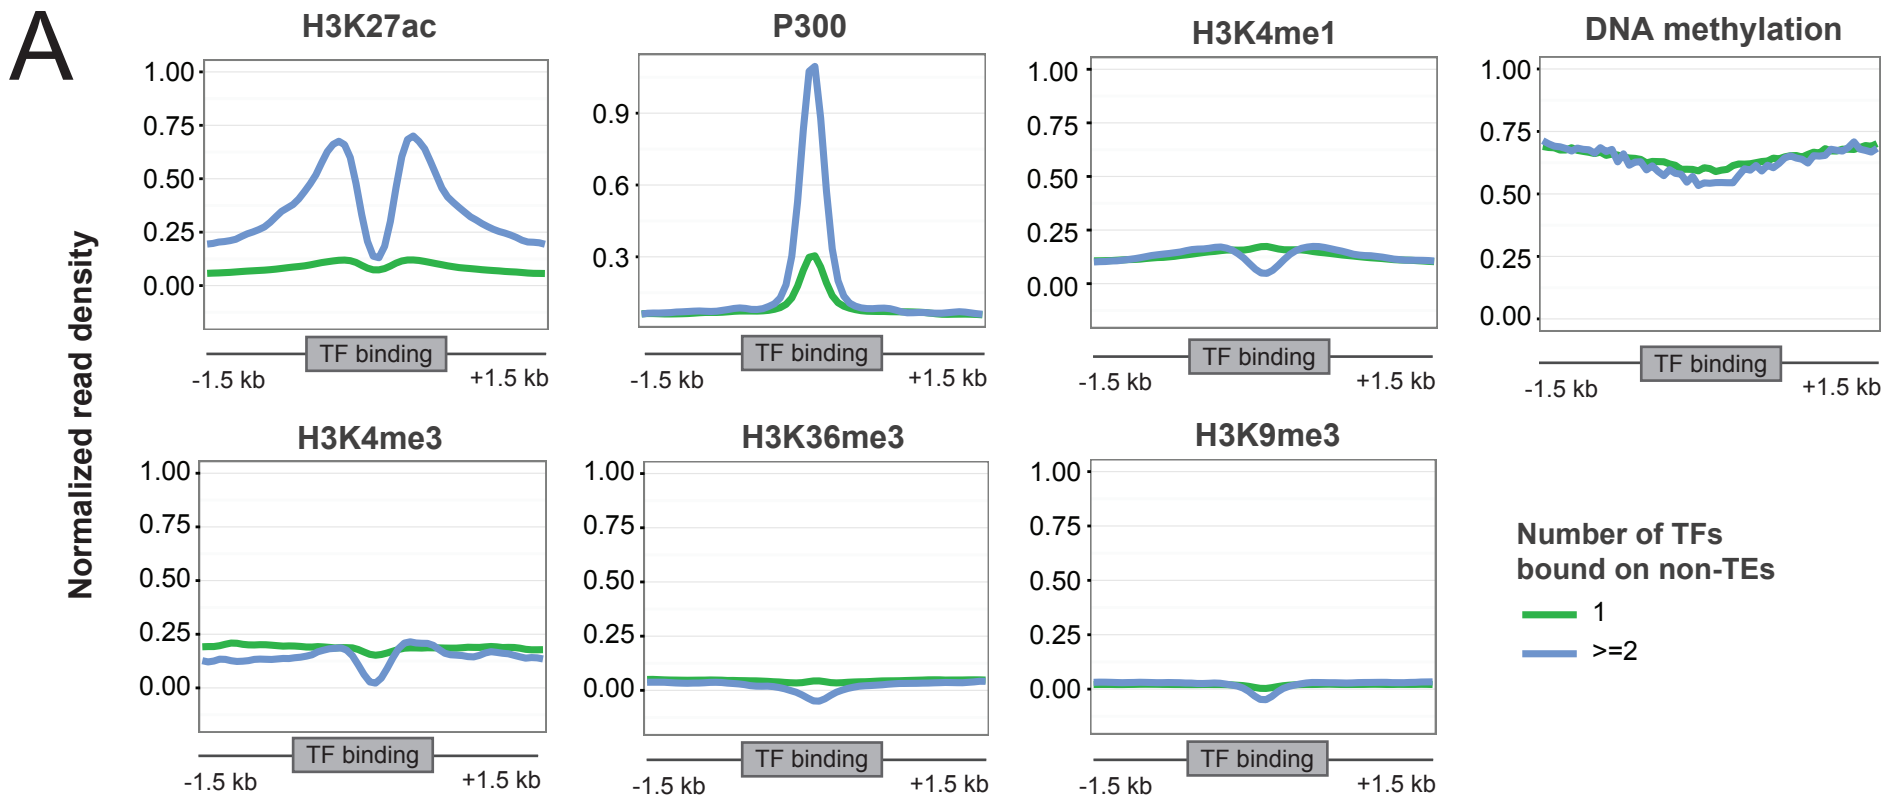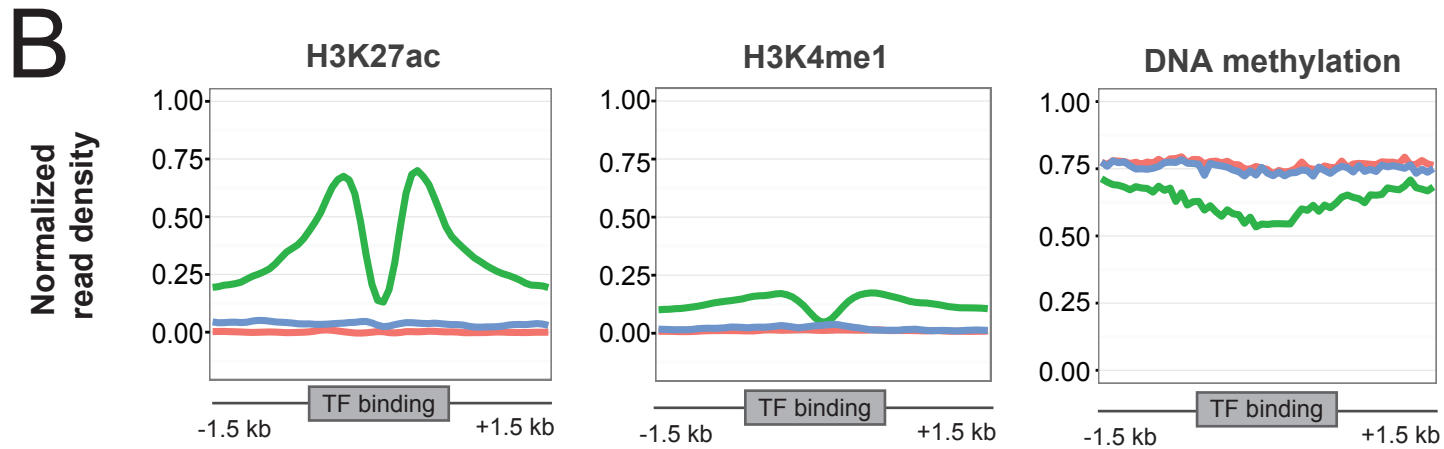

**Supplementary Figure 3:** Epigenetic signature of non-TE genomic regions that are bound *in vivo* by 1 TF, or a cluster of TFs (i.e.,  $\geq 2$  TFs). (A) Normalized read density on non-TE genomic regions for various epigenetic marks (panels). Each region was extended its center by 1.5kb upstream, and downstream. The regions are categorized by the number of TFs bound to the region - one TF or two or more TFs. (B) Comparing the epigenetic signature of non-TE genomic regions with two or more TFs bound in different mouse cell types - embryonic stem (E14), lymphoblastoid (Ch12), and erythroleukemia (Mel) cells.

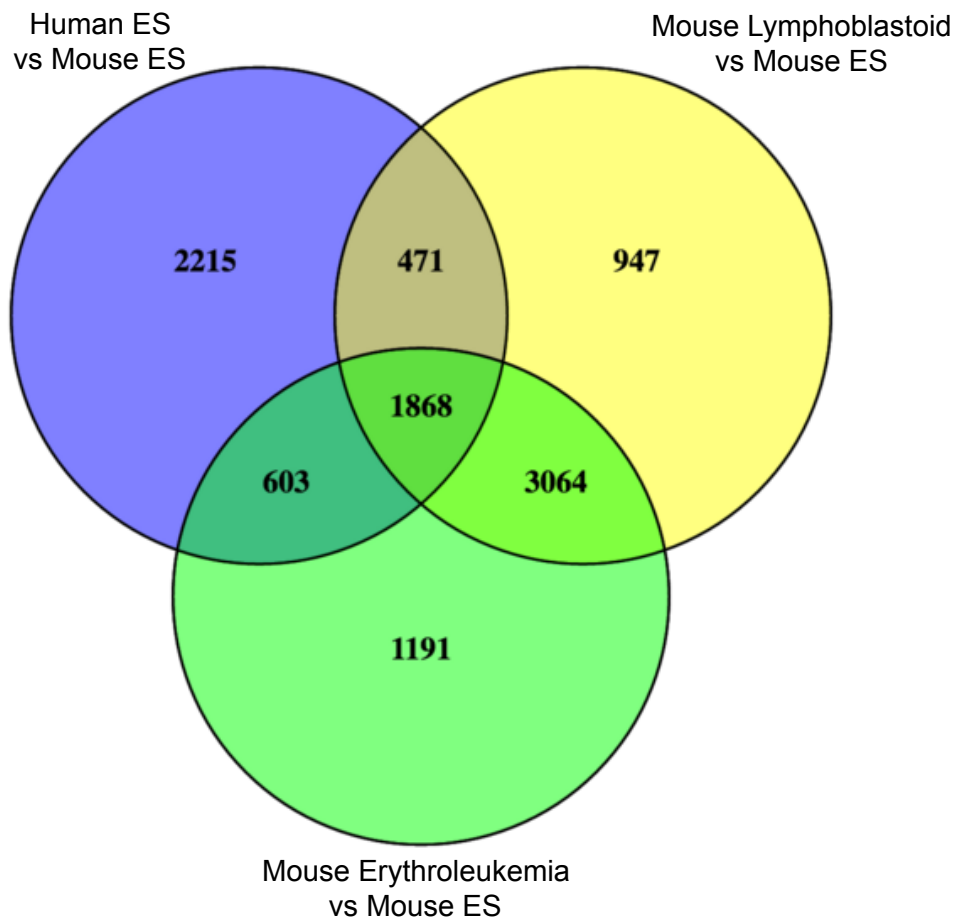

**Supplementary Figure 4:** Differentially expressed genes identified by DEseq (Anders S, et al., Genome Biology 2010), between three pairwise comparisons – human ES, mouse lymphoblastoid and mouse erythroleukemia versus mouse ES cells. Genes that were significantly upregulated in mouse ES cells (adjusted p-value < 0.1 in each pairwise comparison), and common between the three pairwise comparisons were used for further analyses (i.e., 1,868 genes). This figure was generated using *Venny* (Oliveros, JC, 2007-2015 – <http://bioinfogp.cnb.csic.es/tools/venny/index.html>).

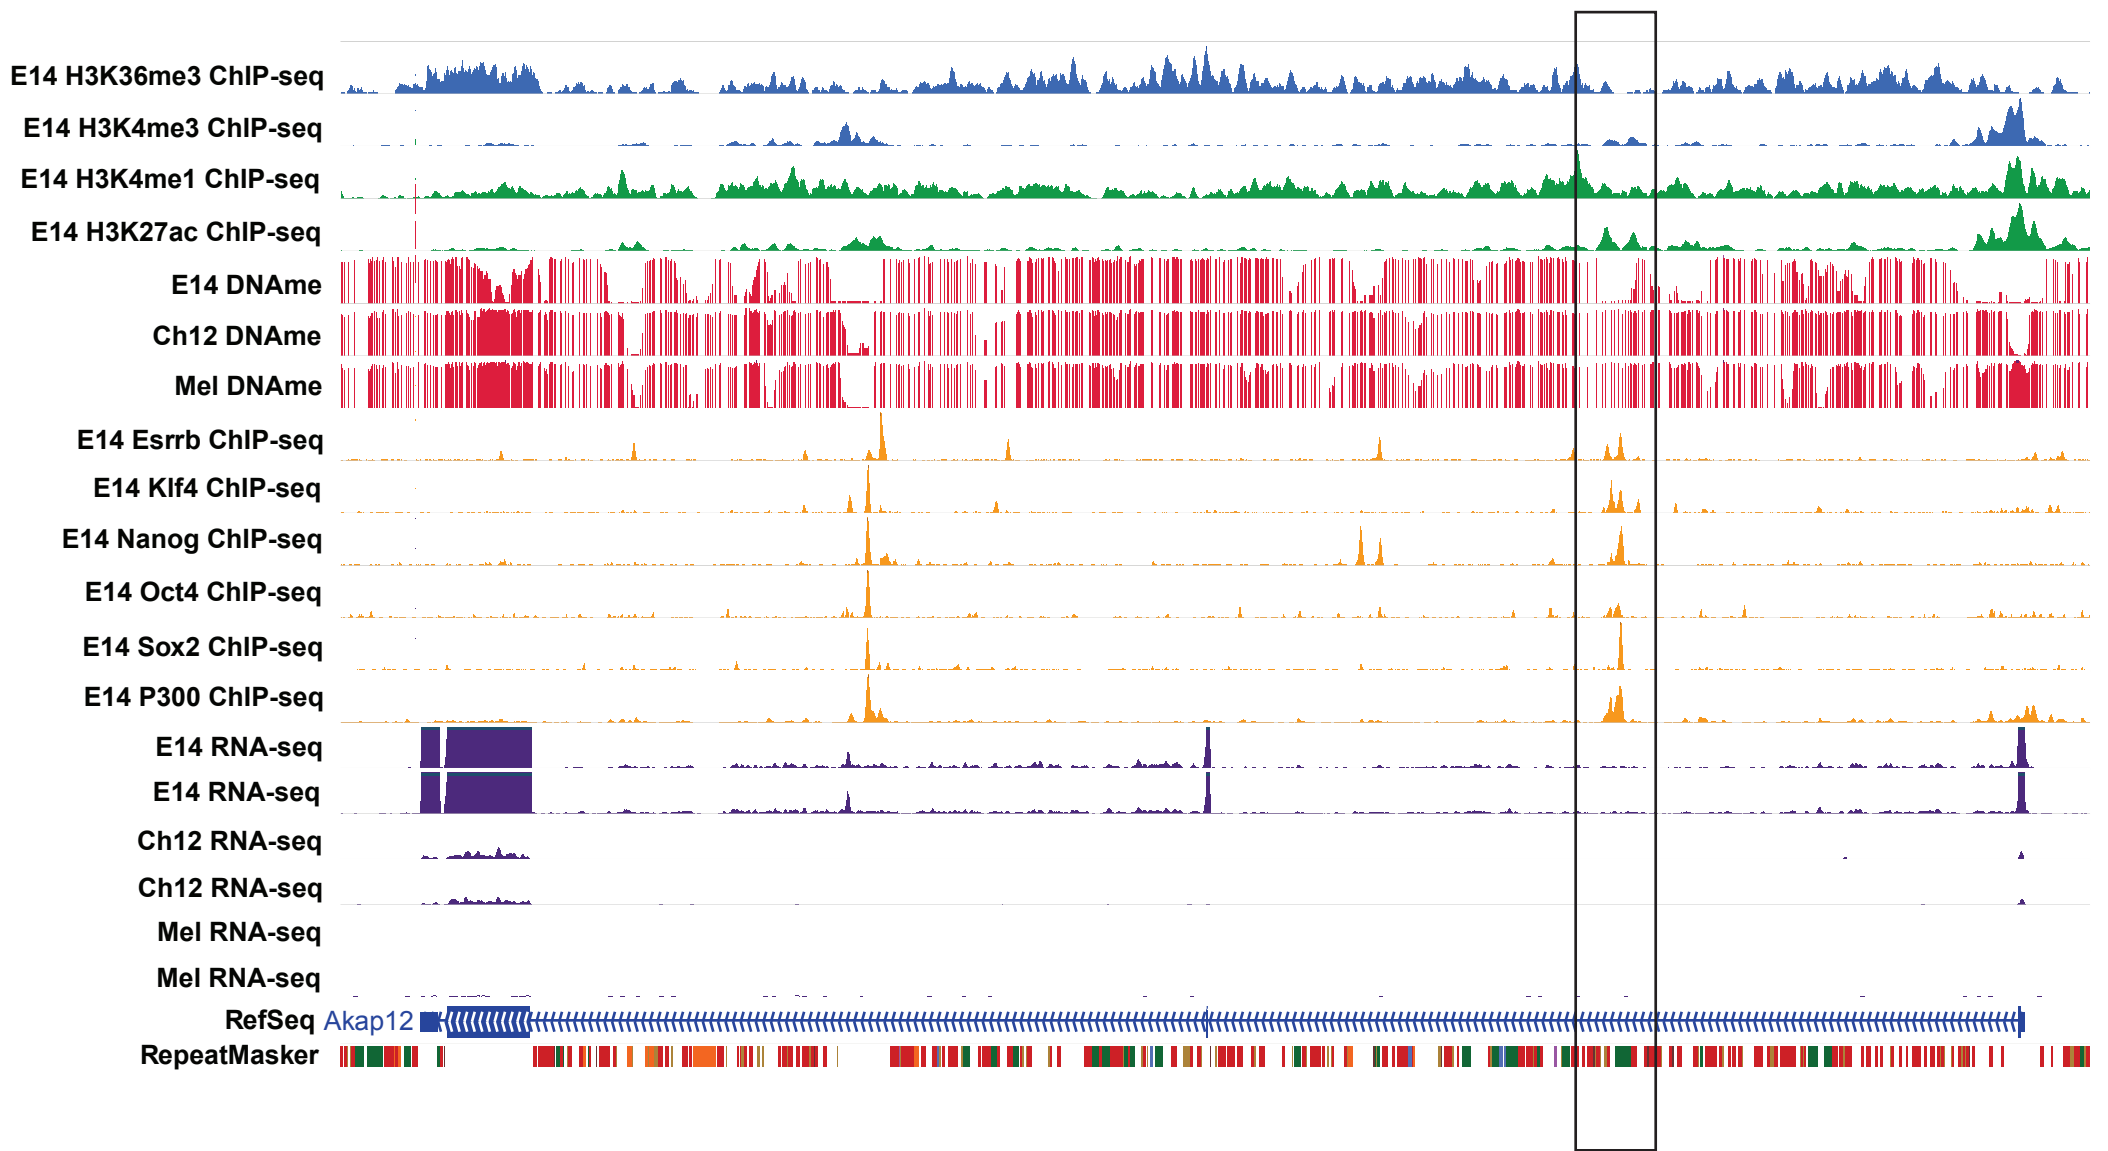

**Supplementary Figure 5:** Genome Browser (WashU Epigenome Browser) view of Akap12 gene that shows ES-specific expression in mouse ES cells (blue tracks: normalized read density for RNA-seq). Akap12 contains a RLTR9E element in its first intron, which is bound by four TFs (yellow tracks: normalized ChIP-seq read density) and is specifically demethylated (red tracks: single-CpG resolution of DNA methylation data) in mouse ES cells. Interestingly, in the second intron of Akap12 is a non-TE region that is also bound by the five TFs but is demethylated in lacks ES-specific hypomethylation. Additional ChIP-seq tracks for H3K36me3, H3K4me3, H3K4me1, and H3K27ac are listed on top.

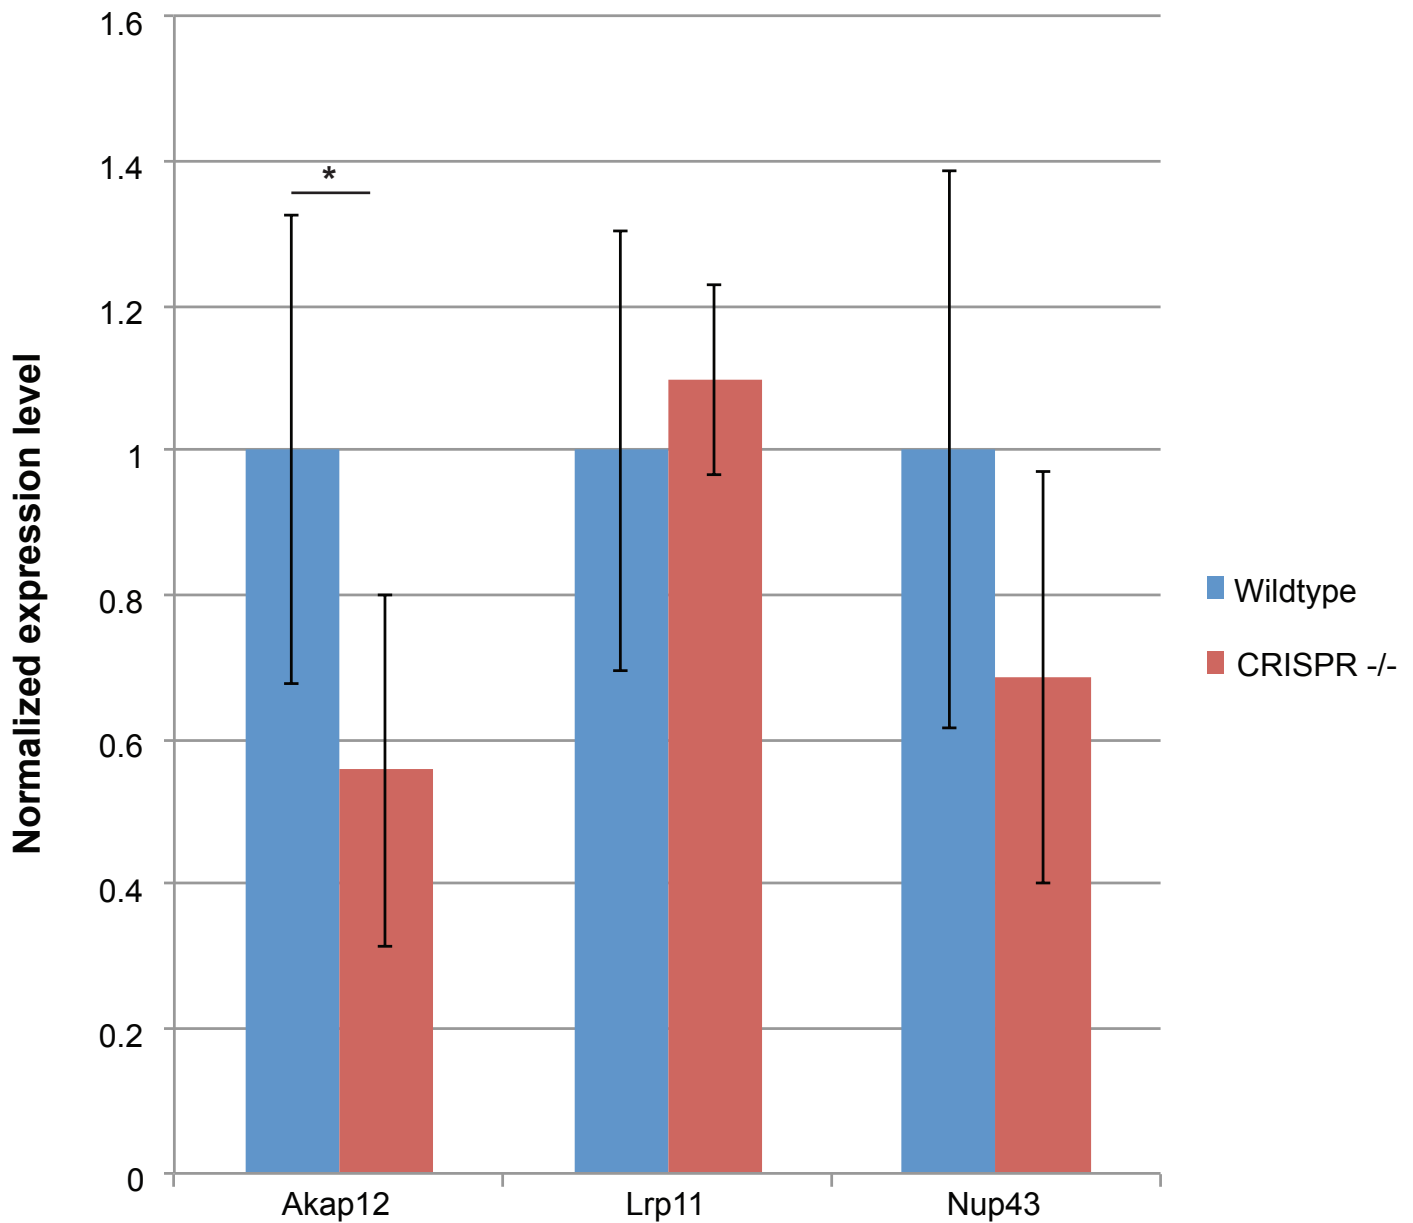

**Supplementary Figure 6:** Normalized expression level of Akap12 and two nearby genes - Lrp11 and Nup43. We performed qRT-PCR of these three genes in wildtype and CRISPR deletion clones (for RLTR9E deletion - labeled "CRISPR -/-") in two biological and three technical replicates. The errorbars represent the standard deviation of the expression levels. Akap12 shows a ~45% reduction in expression level between the WT and CRISPR -/- clones, and is statistically significant as measured by a Student's t-test ( $p$ -value  $< 0.05$ , denoted by \*). Lrp11 and Nup43 does not show any statistically significant change in expression level between the Wildtype and CRISPR -/- clones.

**A**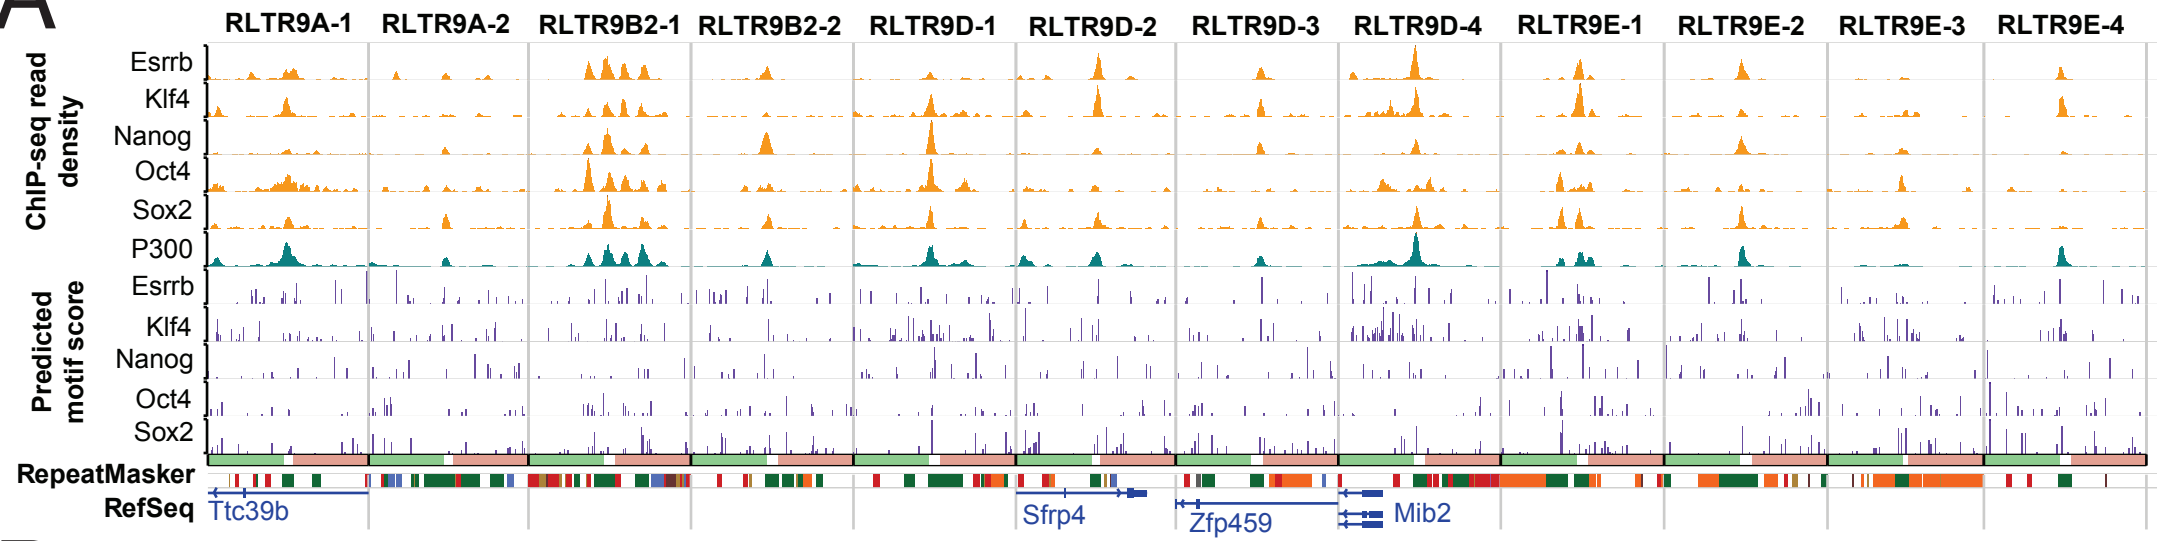**B**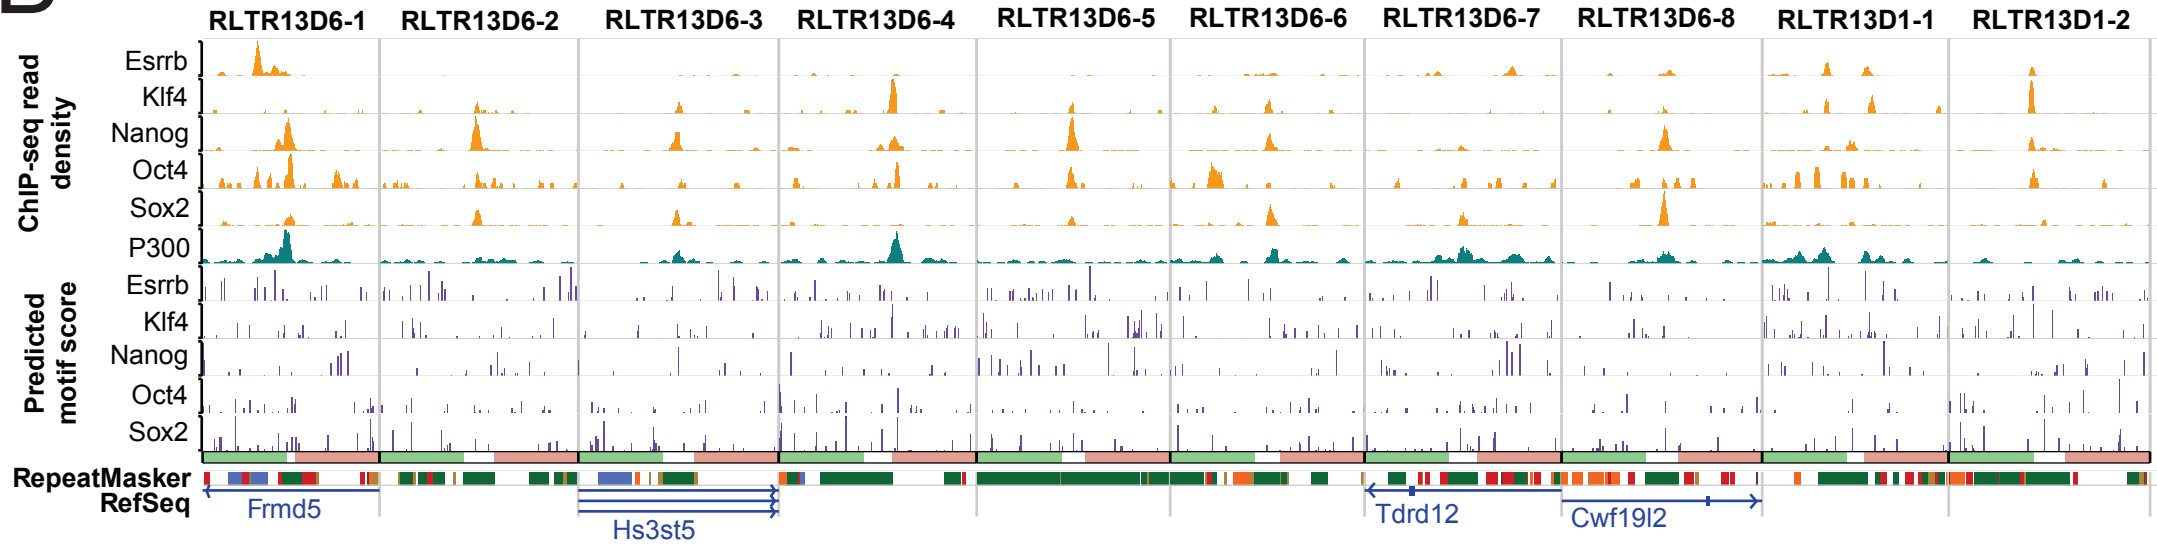

**Supplementary Figure 7:** Gene-set view (WashU Epigenome Browser) of the 22 TEs that were tested in a luciferase assay in mouse ES cells. The view is centered on the TE (horizontal white bar), and shows 2.5 kb upstream (green bar) and downstream (red bar). We show the ChIP-seq read density for the five TFs (yellow tracks), P300 (teal track), and predicted motifs (purple track) for (A) twelve elements from the RLTR9 subfamilies (i.e., RLTR9A, RLTR9B2, RLTR9D, and RLTR9E) and (B) ten elements from the RLTR13 subfamilies. The identifiers at the top of each view corresponds to the labels in Supplementary Table 5A.

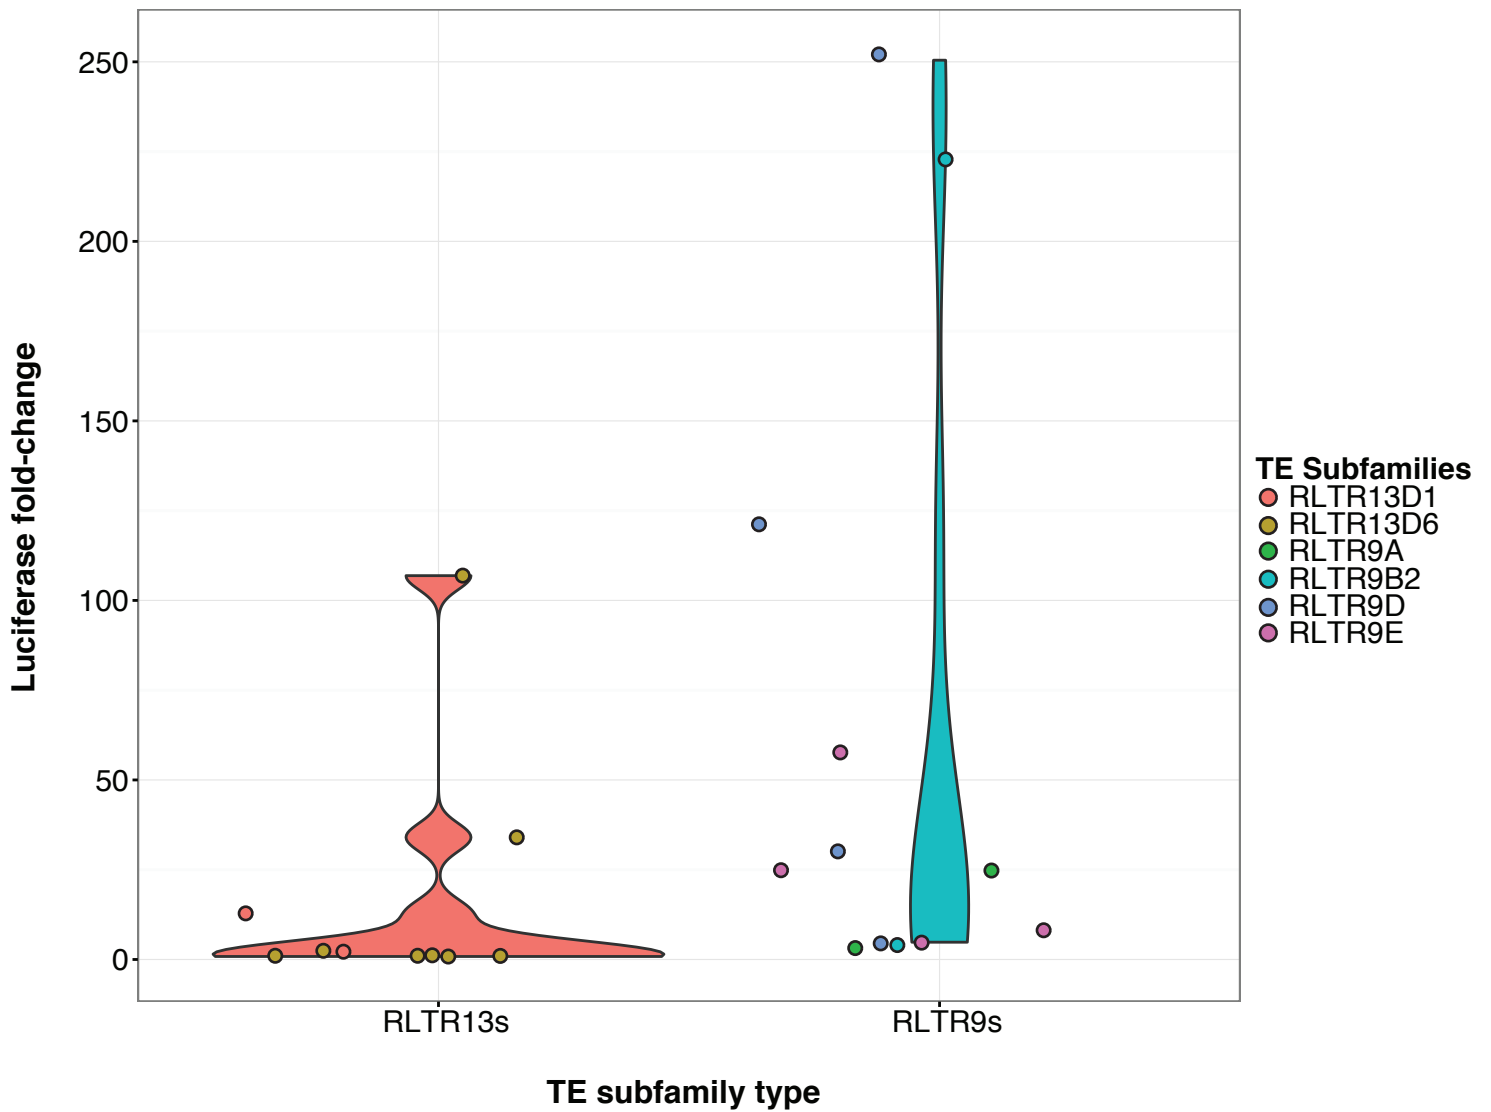

**Supplementary Figure 8:** Distribution of luciferase-fold change values for 22 different TEs (each dot) that we experimentally tested in the luciferase assay in mouse ES cells. On the x-axis are the two categories of TE subfamilies (i.e, RLTR13 vs RLTR9). Overall, we observe that the RLTR13 subfamilies (RLTR13D1 and RLTR13D6) have lower luciferase fold-change values, than the RLTR9 subfamilies (RLTR9A, RLTR9B2, RLTR9D, and RLTR9E).



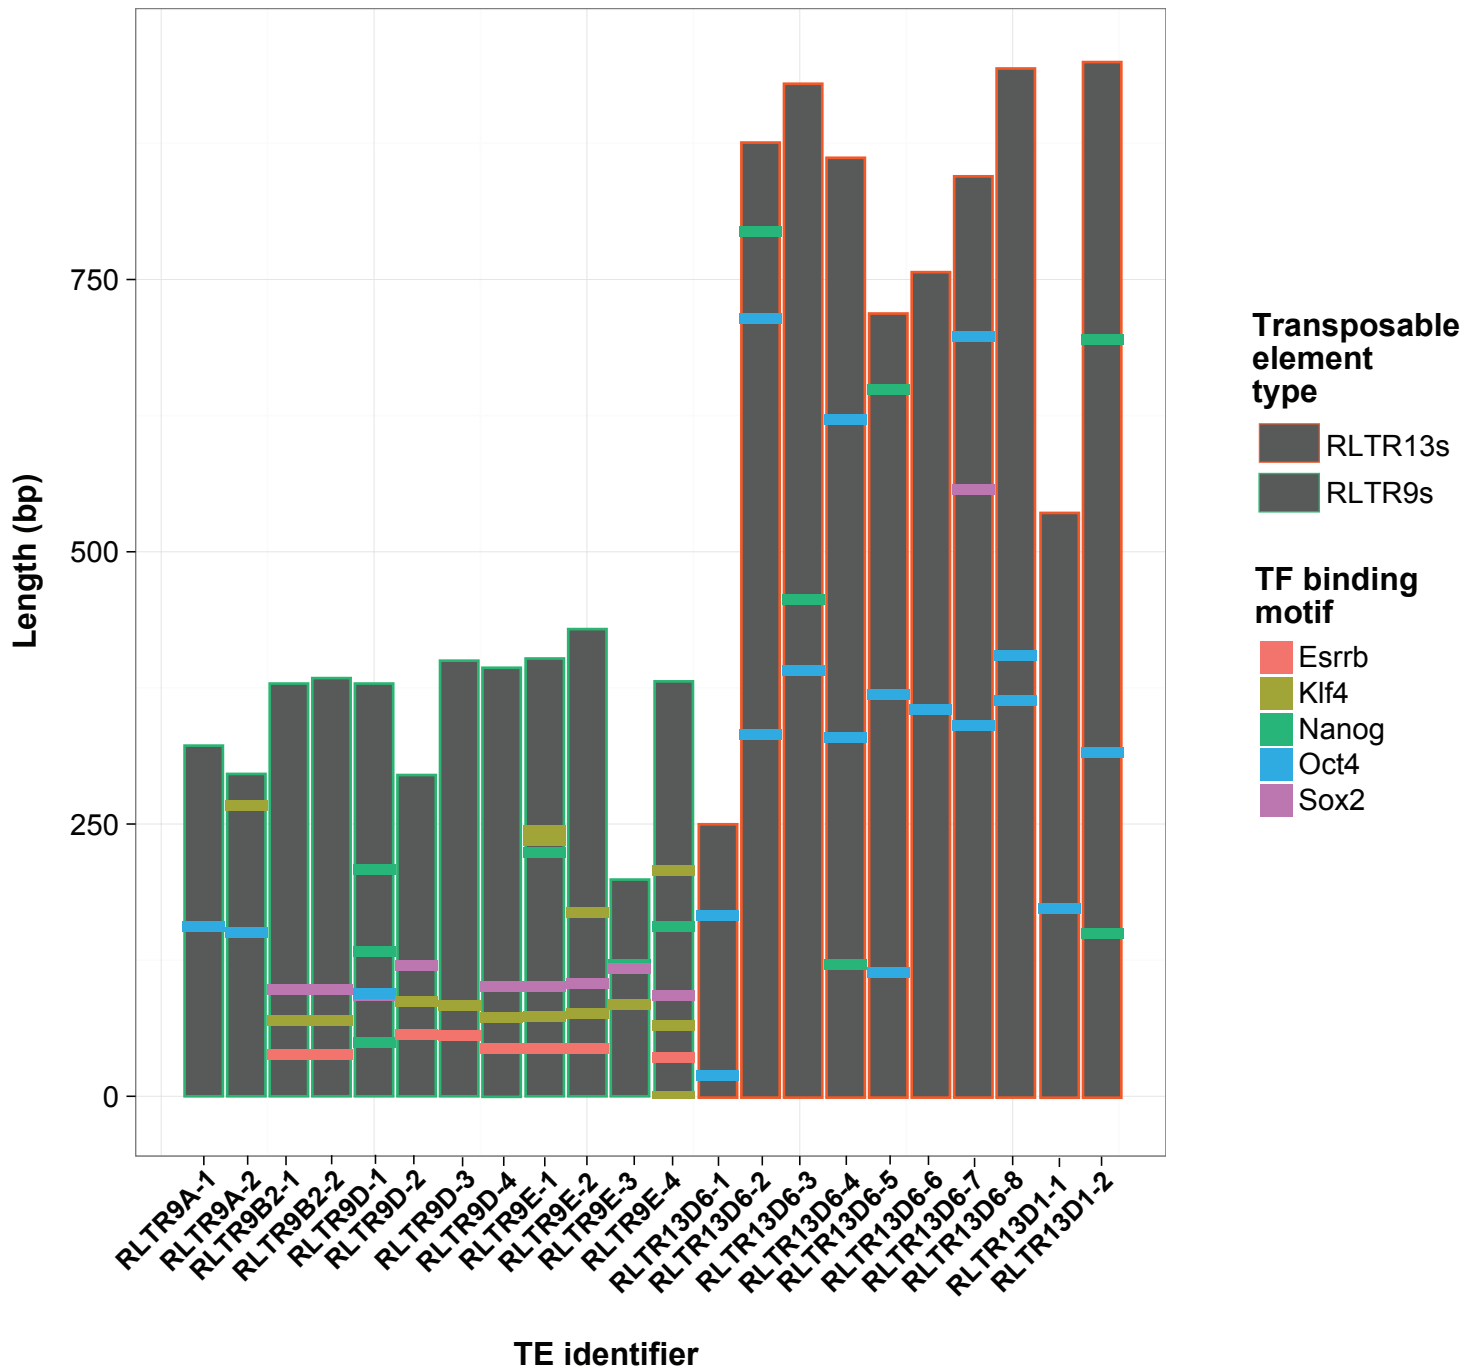

**Supplementary Figure 9:** Motif-annotations in TEs that we tested in the luciferase assay (Figure 4A). The TEs (x-axis) belong to two types of TE subfamilies - RLTR9s (green outline) and RLTR13s (orange outline). Each TE is represented by a bar, whose height represents the length (bp) of the TE (y-axis). The small bars in each TE represents an identified motif for the various pluripotency TFs (see legend).

A

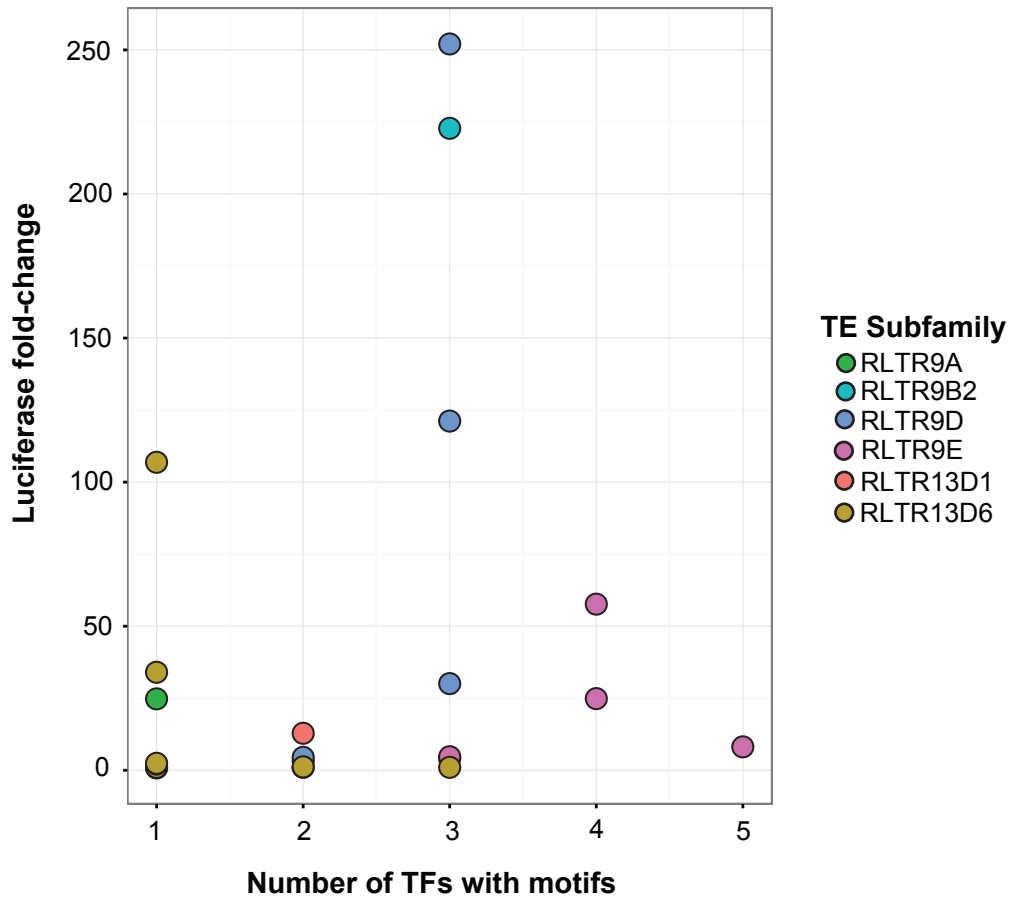

B

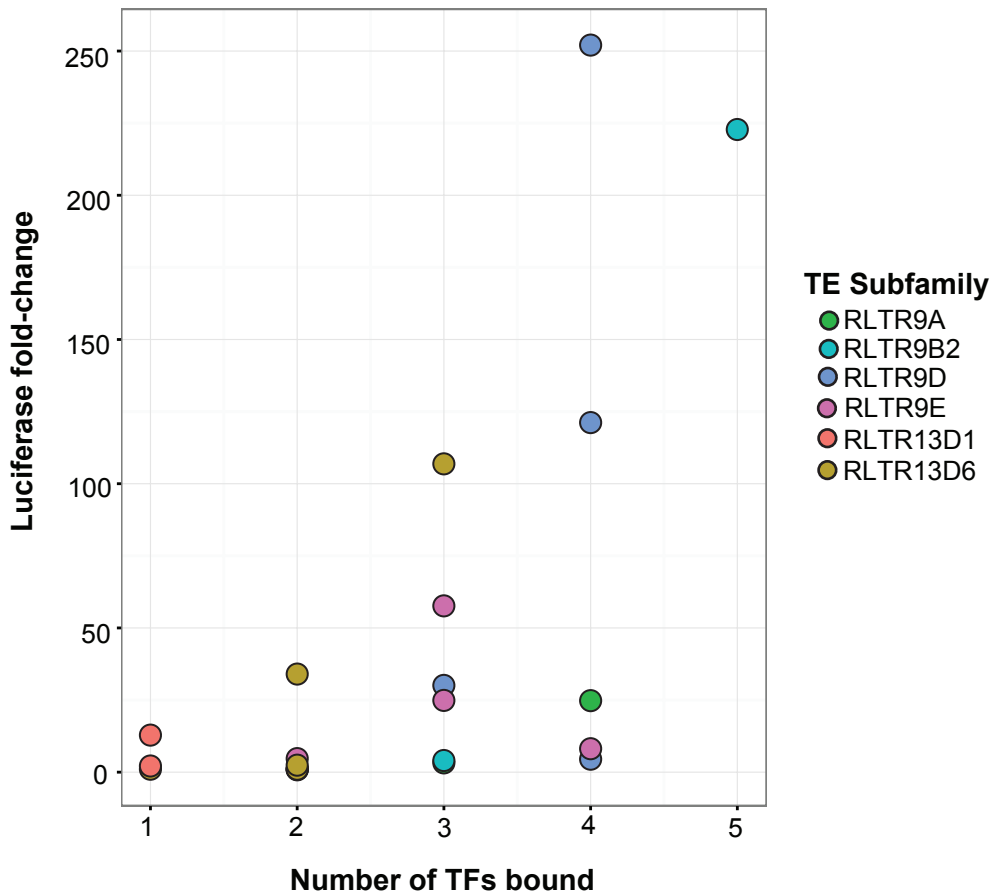

**Supplementary Figure 10:** Distribution of the regulatory potential (luciferase fold-change, y-axis) in mouse ES cells versus (A) the number of TFs with motifs predicted in the TE, and (B) the number of TFs bound to the TE. Here, we see that increasing the number of TFs with binding sites (motifs and peaks) corresponds with an increase in the luciferase expression driven by the TE. However, exceeding a certain limit corresponds with a decrease in the regulatory potential of the TE.

**A**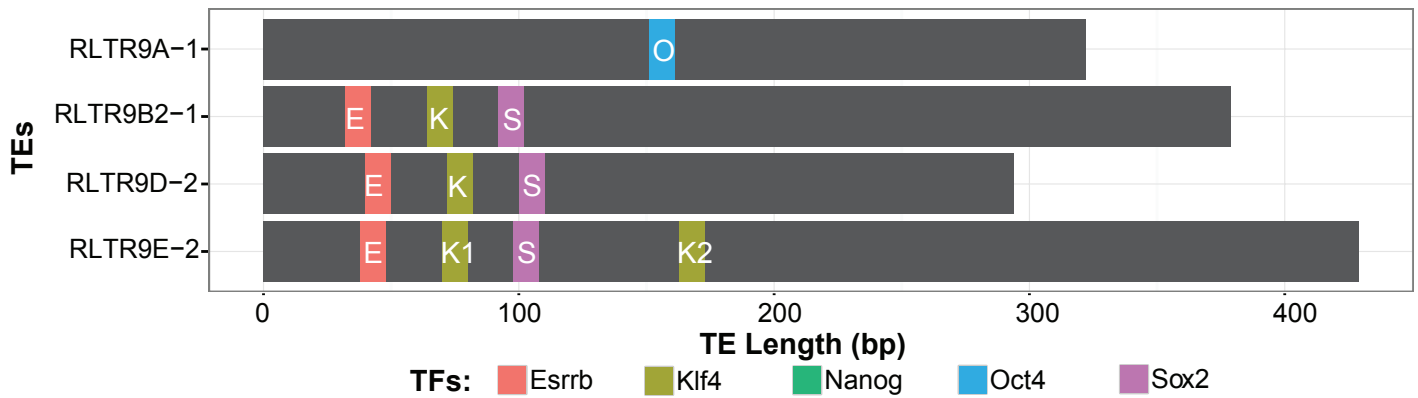**B**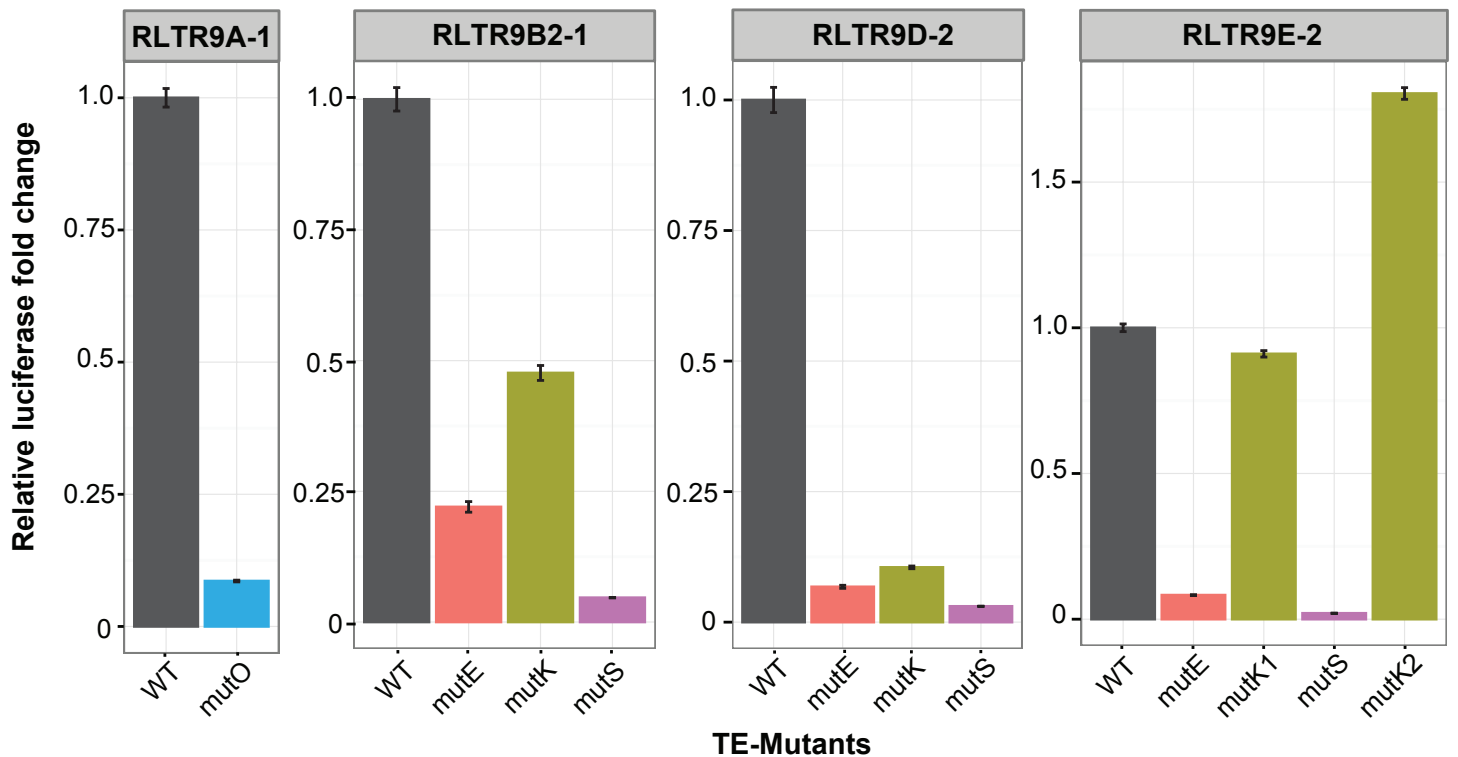

**Supplementary Figure 11:** (A) Motif-annotations in TE selected for site-directed mutagenesis and luciferase assay. The row names refer to the identifier of the TE (listed in Supplementary Table 5A). Each bar represents a TE, and is annotated with the motif predictions for the five pluripotency TFs. (B) Relative luciferase fold-change of each of the four TEs shown in (A) in which each motif was mutated. The luciferase fold-change of the mutant sequence was normalized to the wildtype (WT) luciferase fold-change for each TE, to show the difference in the regulatory potential. Error bars represent s.d. Overall, the reduction in regulatory potential caused by mutations to Esrrb (E), Klf4 (K) and Sox2 (S) indicates a synergistic relationship between the motifs. The contribution of all three motifs together is more than the sum of each motif's contribution. Additionally, we observe differences in the effect of the two Klf4 motifs (K1 and K2) to the regulatory potential of RLTR9E-2. It appears that K2 in RLTR9E-2 might have a repressive effect (Evans, P, et al., JBC 2007; Rowland, BD, et al., Nat. Cell Biol. 2005) on K1, since mutating K2 results in an increase in the regulatory potential of RLTR9E-2.

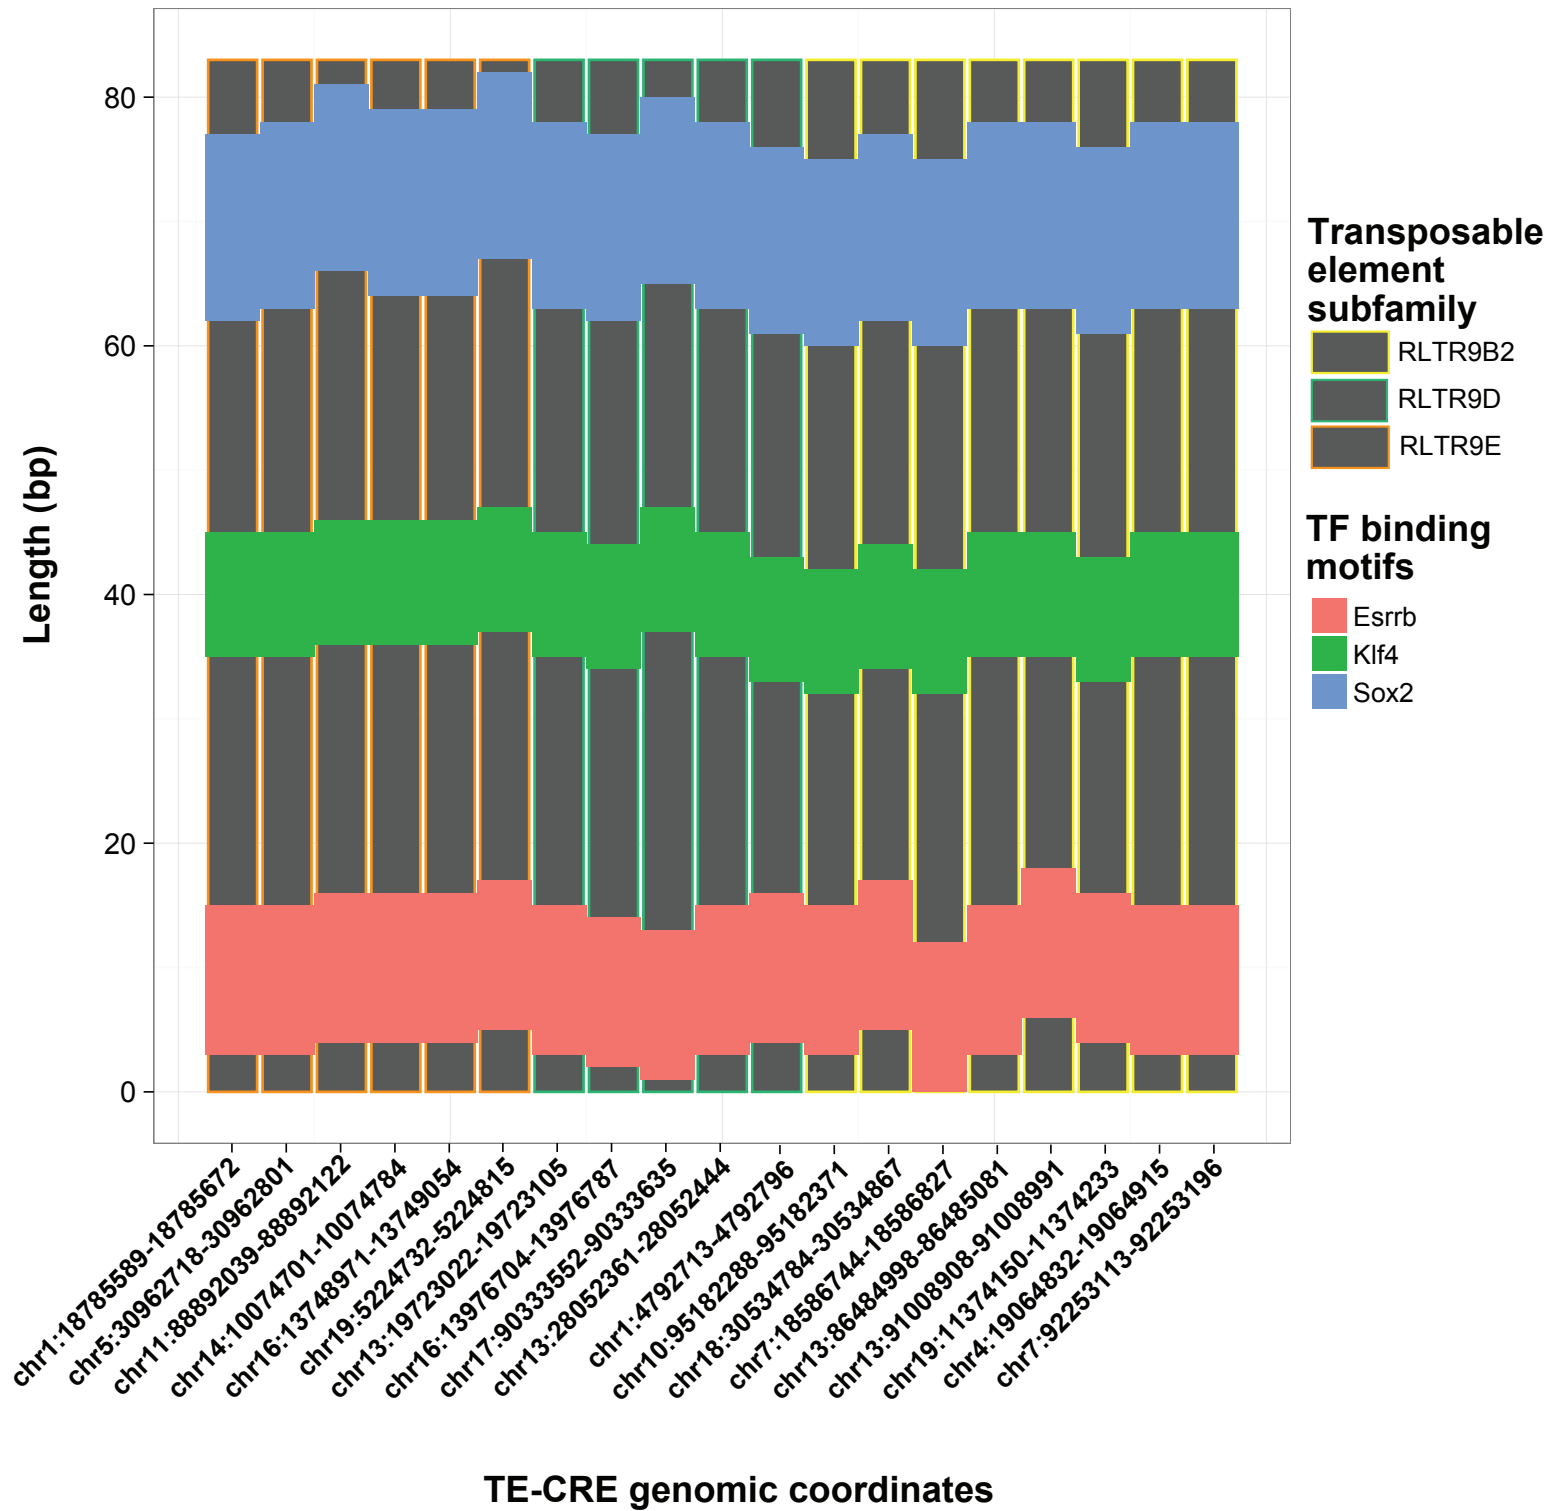

**Supplementary Figure 12:** Motif-annotations in TE cis-regulatory elements used in CRE-seq (Kwasnieski J, PNAS, 2012). We tested the effect of the Esrrb, Klf4, and Sox2 (EKS) motifs in these elements by mutating individual motifs and all three motifs.

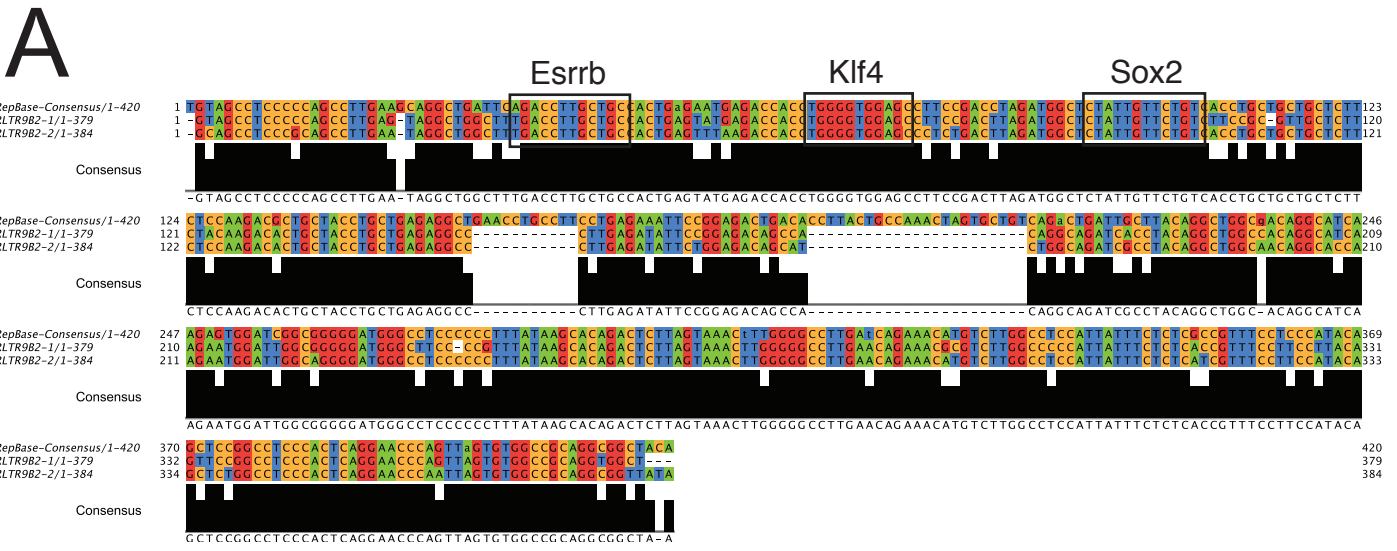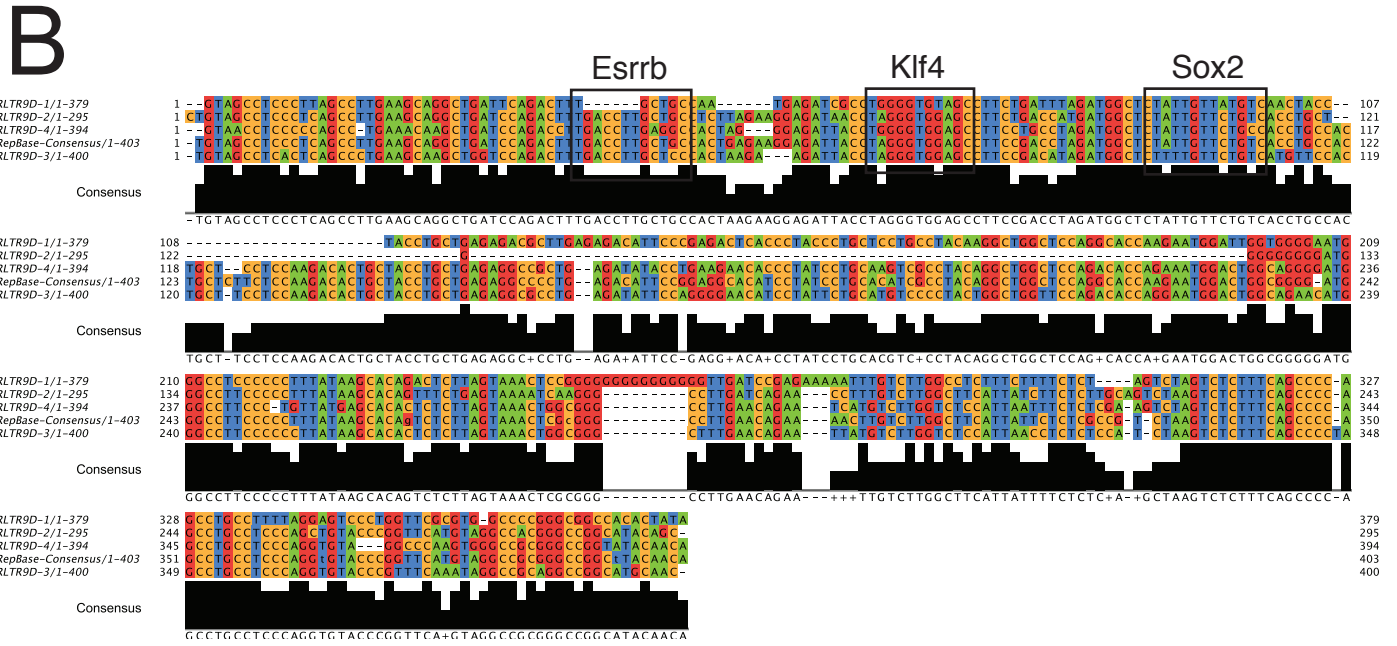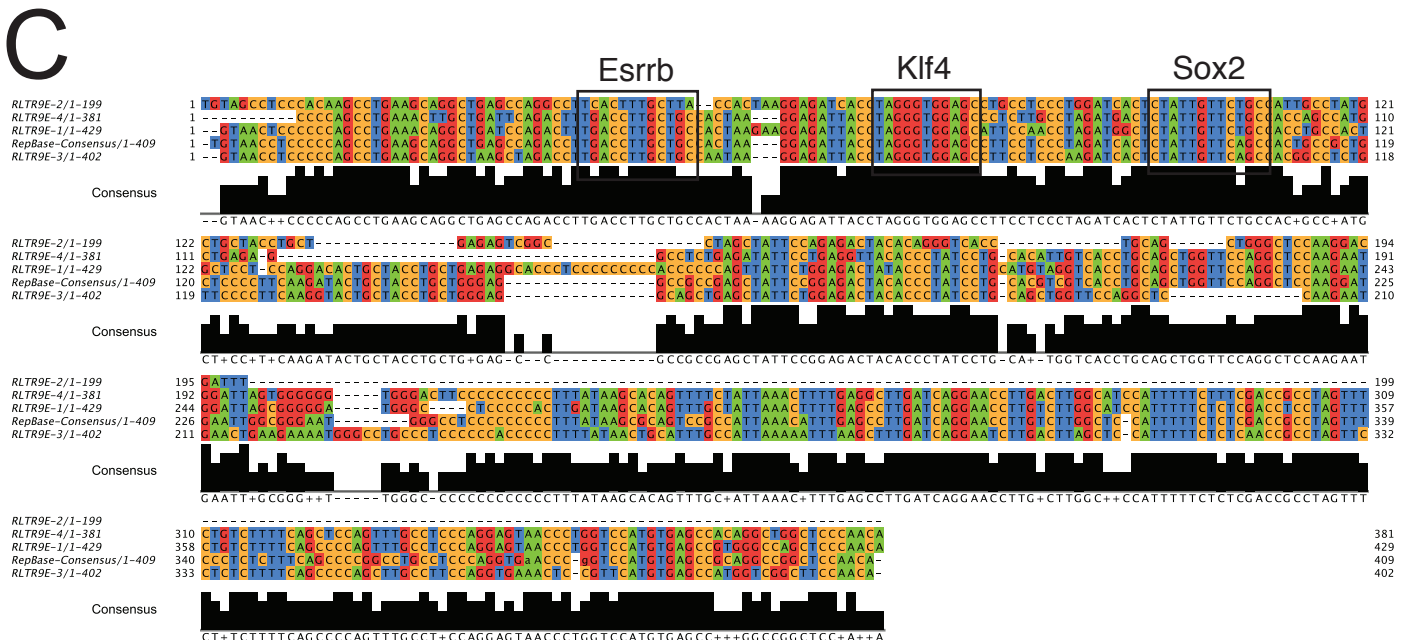

**Supplementary Figure 13:** Comparison between the RepBase-consensus and genomic TE sequences for TE subfamilies - (A) RLTR9B2, (B) RLTR9D, and (C) RLTR9E. Each row represents the genomic and RepBase-consensus sequence of each TE subfamily. The “Consensus” panel represents the most-frequent nucleotide in a position, based on the multiple-sequence alignment (created by ClustalO (65)).

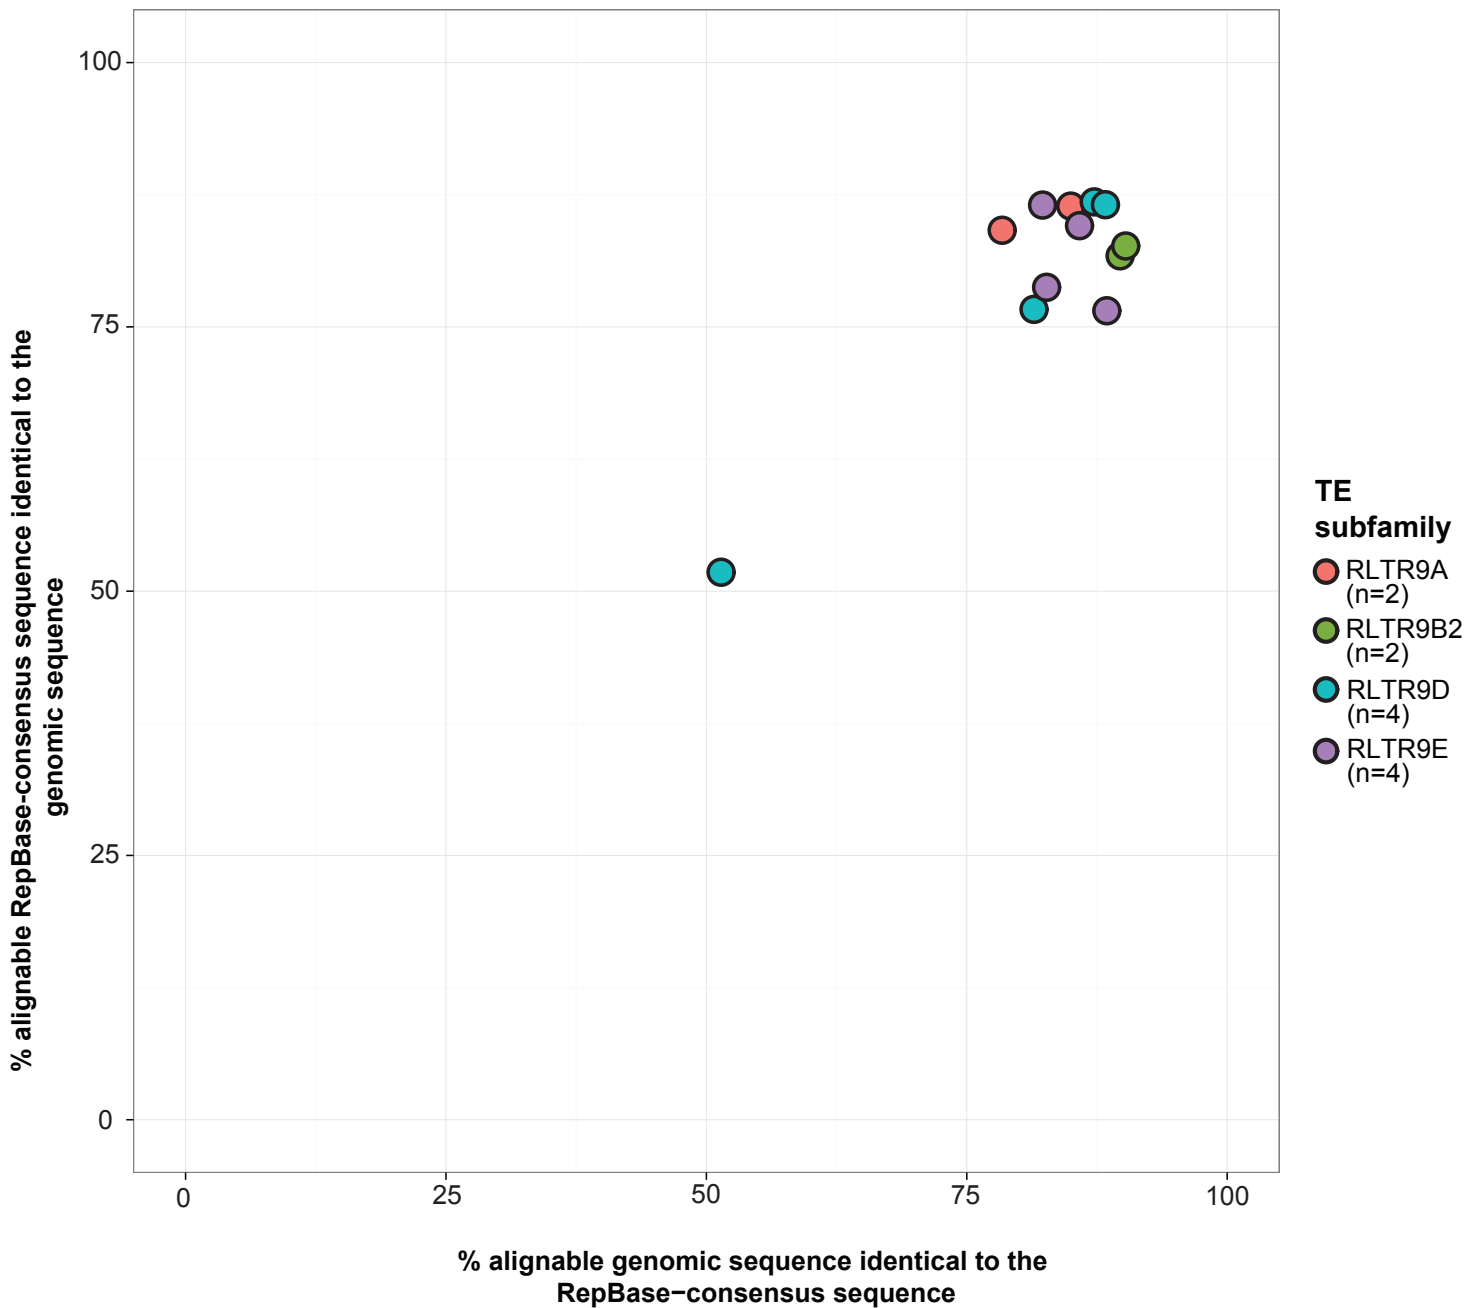

**Supplementary Figure 14:** Comparison between sequence identity between the RepBase-consensus (x-axis) and genomic TE (y-axis) sequences for TE subfamilies - RLTR9A, RLTR9B2, RLTR9D, and RLTR9E. Each dot represents the pairwise alignment between the RepBase-consensus sequence and the genomic copy of four TE subfamilies (i.e., RLTR9A, RLTR9B2, RLTR9D, and RLTR9E) that we characterized in reporter assays. In total, we tested 12 genomic copies belonging to these four TE subfamilies (number of experimentally tested genomic copies represented by 'n' in the legend), and there is one dot per genomic copy. Each dot represents the percentage of the RepBase-consensus (on the x-axis) and genomic (on the y-axis) sequence that is identical based on a pairwise alignment using *blast2* (Altschul SF, et. al., J. Mol. Biol., 1990).

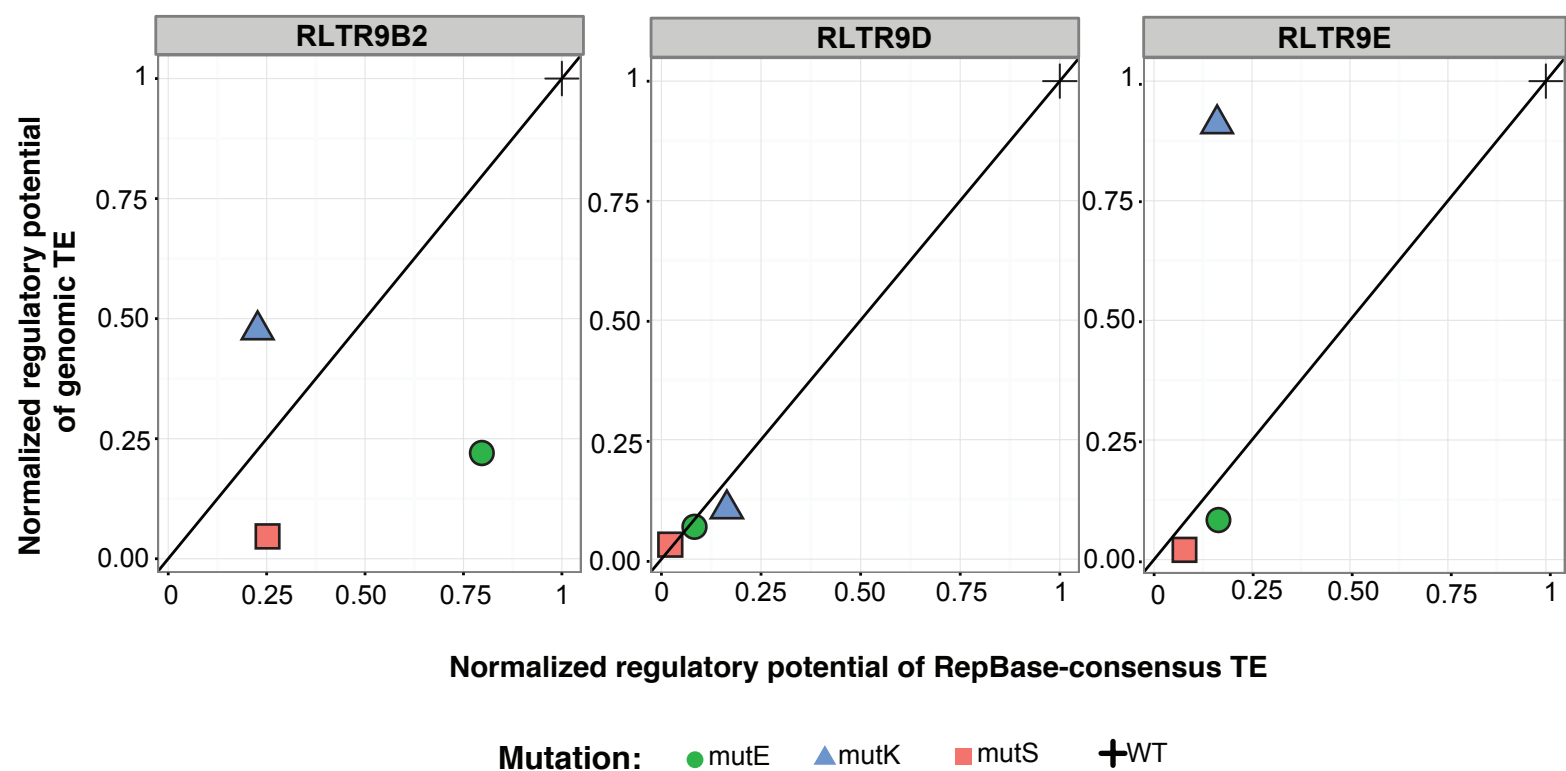

**Supplementary Figure 15:** Comparing the effect of mutations to the EKS motif-module in genomic TE sequences and the respective RepBase-TE-consensus sequence. We compared the normalized regulatory potential of the RepBase-consensus TE (x-axis) and genomic TE (y-axis). Each point represents a different TF motif that was mutated (legend describes the shape and color associated with each mutation). We compared the regulatory potential of the mutant sequences normalized to its respective wildtype sequence.

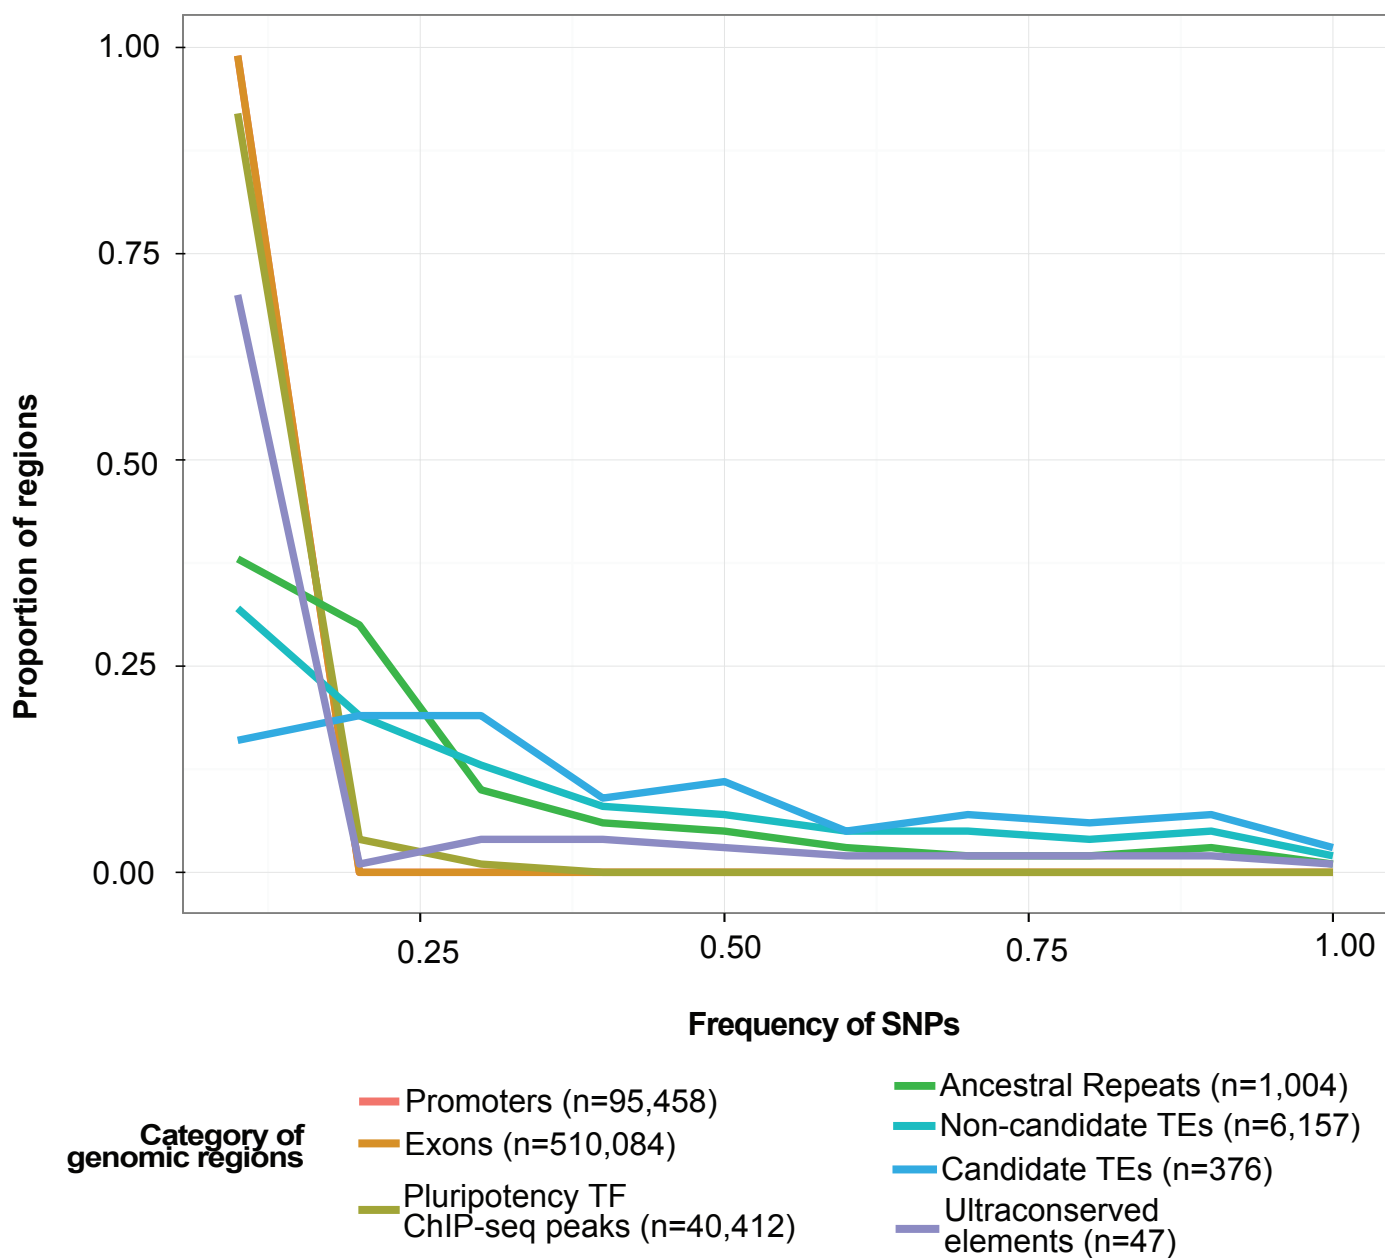

**Supplementary Figure 16:** Proportion of genomic regions (y-axis) associated with SNP frequency (x-axis) for mouse promoters, exons, ChIP-seq binding peaks used in this study (non-TE overlapping), ancestral repeats, TEs bound by multiple TFs (i.e., Candidate TEs), TEs bound by one TF and unbound TEs (i.e., Non-candidate TEs), and ultraconserved elements. In the legend, 'n' in the parentheses represents the number of genomic regions considered. We used SNPs identified from the mouse genome sequencing project (Keanne, TM, et al., Nature 2011; Nikolskiy, I, et al., BMC Genomics, 2015). Similar to the standard evolutionary analysis metric of derived allele frequency (DAF), we used SNPs in nineteen mouse strains (from the two referenced studies) to determine the frequency of SNPs in the TEs and other control regions. For comparison, we used genetic elements that are known to be under purifying selection pressures (i.e., promoters, exons, and ultraconserved elements (Pennachio, LA, et al., Nature 2006), and neutrally evolving sequences (i.e., ancestral repeats defined as human-mouse orthologous TEs). The candidate TEs (six TE subfamilies that are bound  $\geq 2$  pluripotency TFs) have a similar distribution of SNP frequency scores as neutrally evolving sequences.



**Supplementary Table 1: Percentage of pluripotency TF *in vivo* binding peaks in TEs.**

| Transcription Factor (TF) | Total number of peaks in the genome | Number of peaks in TEs | Percentage of peaks in TEs |
|---------------------------|-------------------------------------|------------------------|----------------------------|
| Esrrb                     | 21644                               | 5719                   | 26.423                     |
| Klf4                      | 10872                               | 1449                   | 13.328                     |
| Nanog                     | 10342                               | 2946                   | 28.486                     |
| Oct4                      | 3761                                | 760                    | 20.207                     |
| Sox2                      | 4525                                | 1218                   | 26.917                     |

**Supplementary Table 2: Percentage of clusters of TF binding peaks in TEs.**

| Number of peaks in the cluster | Total number of peaks in the genome | Number of peaks in TEs | Percentage of peaks in TEs (%) |
|--------------------------------|-------------------------------------|------------------------|--------------------------------|
| 1                              | 35765                               | 8005                   | 22.382                         |
| 2                              | 4377                                | 921                    | 21.041                         |
| 3                              | 1437                                | 299                    | 20.807                         |
| 4                              | 449                                 | 96                     | 19.238                         |
| 5                              | 103                                 | 15                     | 14.563                         |

**Supplementary Table 3: TE subfamilies that showed statistical significance (hypergeometric p-value < 1e<sup>-5</sup>) in their enrichment for clusters of *in vivo* TF binding sites**

| Number of TFs | TE Subfamily | TE Class | TE Family | Number of TEs overlapping TF-clusters | Log-Odds Ratio | p-value   |
|---------------|--------------|----------|-----------|---------------------------------------|----------------|-----------|
| 1             | ID_B1        | SINE     | B4        | 1945                                  | 3.368          | 0         |
| 1             | RLTR13D1     | LTR      | ERVK      | 39                                    | 2.632          | 3.43E-24  |
| 1             | RLTR13D6     | LTR      | ERVK      | 143                                   | 3.814          | 3.91E-132 |
| 1             | RLTR23       | LTR      | ERV1      | 48                                    | 2.207          | 1.15E-09  |
| 1             | RLTR25A      | LTR      | ERVK      | 60                                    | 2.008          | 1.85E-14  |
| 1             | RLTR25B      | LTR      | ERVK      | 91                                    | 2.541          | 2.74E-23  |
| 1             | RLTR41       | LTR      | ERV1      | 62                                    | 3.042          | 1.39E-26  |
| 1             | RLTR9A2      | LTR      | ERVK      | 16                                    | 4.063          | 1.93E-12  |
| 1             | RLTR9A       | LTR      | ERVK      | 87                                    | 3.683          | 8.78E-50  |
| 1             | RLTR9B2      | LTR      | ERVK      | 51                                    | 5.141          | 3.05E-54  |
| 1             | RLTR9D       | LTR      | ERVK      | 96                                    | 4.778          | 1.44E-89  |
| 1             | RLTR9E       | LTR      | ERVK      | 97                                    | 3.761          | 2.93E-63  |
| 1             | RMER10A      | LTR      | ERVL      | 86                                    | 2.446          | 6.40E-21  |
| 1             | RMER10B      | LTR      | ERVL      | 42                                    | 2.054          | 2.67E-06  |
| 1             | RMER16       | LTR      | ERVK      | 60                                    | 2.874          | 7.09E-24  |
| 2             | RLTR11B      | LTR      | ERVK      | 17                                    | 4.187          | 2.40E-13  |
| 2             | RLTR12B      | LTR      | ERVK      | 15                                    | 3.358          | 5.94E-09  |

|   |          |     |      |    |       |           |
|---|----------|-----|------|----|-------|-----------|
| 2 | RLTR13D6 | LTR | ERVK | 82 | 6.043 | 1.10E-129 |
| 2 | RLTR25A  | LTR | ERVK | 12 | 2.716 | 4.55E-06  |
| 2 | RLTR25B  | LTR | ERVK | 19 | 3.312 | 1.38E-09  |
| 2 | RLTR9A   | LTR | ERVK | 27 | 5.026 | 1.40E-26  |
| 2 | RLTR9B2  | LTR | ERVK | 25 | 7.143 | 8.01E-42  |
| 2 | RLTR9D   | LTR | ERVK | 31 | 6.178 | 2.71E-42  |
| 2 | RLTR9E   | LTR | ERVK | 46 | 5.715 | 2.02E-56  |
| 2 | RMER10A  | LTR | ERVL | 21 | 3.443 | 2.71E-11  |
| 2 | RMER16   | LTR | ERVK | 23 | 4.522 | 3.09E-20  |
| 3 | RLTR9A   | LTR | ERVK | 12 | 5.462 | 3.68E-14  |
| 3 | RLTR9B2  | LTR | ERVK | 15 | 8.013 | 1.58E-29  |
| 3 | RLTR9D   | LTR | ERVK | 12 | 6.416 | 4.23E-18  |
| 3 | RLTR9E   | LTR | ERVK | 48 | 7.383 | 8.46E-83  |
| 4 | RLTR9D   | LTR | ERVK | 12 | 8.094 | 3.77E-24  |
| 4 | RLTR9E   | LTR | ERVK | 20 | 7.799 | 6.58E-38  |

**Supplementary Table 4: Expected (labeled “Exp”) number of genomic regions with multiple TF binding sites for candidate TE subfamilies, which showed high enrichment of TF binding. Comparing the observed (labeled “Obs”) number of regions with binding with the number of expected (labeled “Exp”) number of regions.**

| TE subfamily | Number of TFs in genomic region<br>Total length in genome (kb) | 1   |     | 2   |     | 3   |     | 4   |     | 5   |     |
|--------------|----------------------------------------------------------------|-----|-----|-----|-----|-----|-----|-----|-----|-----|-----|
|              |                                                                | Exp | Obs | Exp | Obs | Exp | Obs | Exp | Obs | Exp | Obs |
| RLTR9A       | 519.982                                                        | 5   | 82  | 1   | 29  | 0   | 13  | 0   | 3   | 0   | 0   |
| RLTR9B2      | 110.93                                                         | 1   | 46  | 0   | 30  | 0   | 15  | 0   | 3   | 0   | 1   |
| RLTR9D       | 268.543                                                        | 3   | 93  | 0   | 31  | 0   | 14  | 0   | 13  | 0   | 0   |
| RLTR9E       | 549.178                                                        | 6   | 90  | 1   | 49  | 0   | 52  | 0   | 20  | 0   | 0   |
| RLTR13D1     | 482.859                                                        | 5   | 33  | 1   | 6   | 0   | 1   | 0   | 0   | 0   | 0   |
| RLTR13D6     | 780.388                                                        | 8   | 129 | 1   | 85  | 0   | 11  | 0   | 0   | 0   | 0   |

**Supplementary Table 5A: Primers for targeting TEs from the genome, used in Figure 4A. The TE identifiers listed below are collected into two categories in Figure 4, and are labeled “RLTR9s” and “RLTR13s”.**

| TE Identifier | Left Primer                          | Right Primer                         |
|---------------|--------------------------------------|--------------------------------------|
| RLTR9A-1      | AGGTCCGGTACCAGTCCTAGGTTATGC<br>CCTTC | GAACTTGCTAGCAGTTACCCAGTGTAG<br>CTGTC |
| RLTR9A-2      | AGGTCCGGTACCCACACGAGACTGTG<br>CCCTTC | GAACTTAGATCTAGCTGGAACCCCTGA<br>AAGGG |
| RLTR9B2-1     | AGGTCCGGTACCCATGAGAAATTGTAG<br>CCTCC | GAACTTAGATCTACTTCTTGTAAGCCAC<br>CTGC |
| RLTR9B2-2     | AGGTCCGGTACCGATGGGGAATTGCA<br>GCCTCC | GAACTTAGATCTCAATATCCCTATAACC<br>GCC  |

|            |                                           |                                            |
|------------|-------------------------------------------|--------------------------------------------|
| RLTR9D-1   | ATTCAAGGTACCCACCCTATATGTAG<br>CCTCC       | GAACTTAGATCTGGACTCTGTCTATAGT<br>GTGGCCGCC  |
| RLTR9D-2   | AGGTCCGGTACCCACTGTTGCGTGCTG<br>TATGC      | GAACTTAGATCTATCTCACAAGTGTAGC<br>CTCC       |
| RLTR9D-3   | AGGTCCGGTACCGGCTGTGAATTGTTG<br>CATGC      | GAACTTAGATCTGACAATTCAATGTAGC<br>CTCA       |
| RLTR9D-4   | AGGTCCGGTACCTGCCATAAGCTGTAA<br>CCT        | GAACTTAGATCTTGTAGGTTATTGTTGT<br>ATACCG     |
| RLTR9E-1   | AGGTCCGGTACCAGGGGGAAATTGTA<br>ACCTCC      | GAACTTAGATCTCATTCTCTGCTGTTGG<br>AAGC       |
| RLTR9E-2   | AGGTCCGGTACCCATTCTGTATTGTAA<br>CTCCC      | GAACTTAGATCTGTTTACAATATGTTGG<br>GAGC       |
| RLTR9E-3   | AGGTCCGGTACCAAATTGGCAGCAAAT<br>CGTCC      | GAACTTAGATCTGGTCTTTATGTGTAGC<br>CTCC       |
| RLTR9E-4   | AGGTCCGGTACCCCCCAGCCTGAAA<br>CTTG         | GAACTTAGATCTTTTTTACCTGTGTTGG<br>GAGC       |
| RLTR13D6-1 | AGGTCCGGTACCAAAATCAACATACTC<br>TCCTT      | GAACTTAGATCTTTATGGAAAACCCGTA<br>TCTG       |
| RLTR13D6-2 | ATTCAAGGTACCGCCTACCAAGCAATG<br>CAGTCTGCTT | GAACTTAGATCTGCAGAATATGTGCCAC<br>AGGCTGGGC  |
| RLTR13D6-3 | AGGTCCGGTACCTTCCTTCCTTGCTAC<br>GTCCA      | GAACTTGCTAGCAGGGAGGAAGTGCC<br>ACGGAT       |
| RLTR13D6-4 | ATTCAAGGTACCCTAGTTGCCGTAGAC<br>CCTCTGGGTC | GAACTTGCTAGCAAACACTAGCTGCCA<br>CGCCCTGCCC  |
| RLTR13D6-5 | AGGTCCGGTACCAAACAACAACCAG<br>GAGAAC       | GAACTTGCTAGCCTCTCTTTTGCTACA<br>CCC         |
| RLTR13D6-6 | AGGTCCGGTACCCGTGTATGTGTGCTA<br>CATCC      | GAACTTGCTAGCAAATAAATAAGAAAG<br>CCAGG       |
| RLTR13D6-7 | ATTCAAGGTACCGTTCCTCTGCTGCTAT<br>GCAC      | GAACTTAGATCTCTTTGCAGAGTGCTGC<br>AGACCCTTT  |
| RLTR13D6-8 | ATTCAAGGTACCTTTTAAATTATGCCAT<br>AGACCAGCC | GAACTTAGATCTAAAGTAATTTGCTAC<br>ATCCACTCC   |
| RLTR13D1-1 | AGGTCCGGTACCCAGTATAGCCTGCTA<br>TACCT      | GAACTTAGATCTCTAGGGTAGATGCTAT<br>GCAT       |
| RLTR13D1-2 | ATTCAAGGTACCGATATAACCTTGCCA<br>CACCC      | GAACTTAGATCTATTACAGGTTATGCCGC<br>AGACCCTCT |

**Supplementary Table 5B: Genomic coordinates for positive controls, i.e., non-TE genomic regions bound by multiple pluripotency TFs.**

| Enhancer ID | Nearby Gene | Genomic coordinates       | Forward primer                    | Reverse primer                         |
|-------------|-------------|---------------------------|-----------------------------------|----------------------------------------|
| 1           | Oct4        | chr17:35640880-35641280   | TTAGCTAGCTGGAGA<br>GTGCTGTCTAGG   | ATAAGCTTTCCAAG<br>TCATCCCCCAGG         |
| 2           | Nanog       | chr6:122657250-122657650  | TATGCTAGCTCC CCC<br>ACTTGACCTGAAA | GTAAGCTTCCACA<br>GAAAGAGCAAGAC<br>ACCA |
| 3           | Nanog       | chr6:122652800-122653200  | GAGCTAGCTCTCAA<br>GACACTAAAGAGGCA | AGTAAGCTTAGAT<br>GCCACCAGGGAAC         |
| 4           | Stat3       | chr11:100800830-100801250 | GTGCTAGCACGCCTC<br>CATGCATAATTAA  | CGAAGCTTCTGATT<br>CCCACGTGGTAA         |

|    |      |                        |                                   |                                  |
|----|------|------------------------|-----------------------------------|----------------------------------|
| 5* | Sox2 | chr3:34656690-34657130 | TTAGCTAGCAATGACT<br>AAGAGTTTCTCCA | AGAAGCTTTTAAAG<br>TCTCCTTCACAAGA |
|----|------|------------------------|-----------------------------------|----------------------------------|

\* This genomic region was selected from a previous publication (Li et al., PLoS ONE 2014, doi:10.1371/journal.pone.0114485) that studied an enhancer and near the Sox2 gene.

**Supplementary Table 5C: Genomic coordinates for negative controls, i.e. TEs from the same TE subfamilies that are not bound by any of the five pluripotency TFs.**

| TE-ID       | Genomic coordinates           | Forward primer                       | Reverse primer                       |
|-------------|-------------------------------|--------------------------------------|--------------------------------------|
| RLTR9A-2    | chr17:69912769-69913057       | ATCTAGCTAGCGTTTT<br>ACAACCTTGGCTGGAG | ATCCAAGCTTTGTAGC<br>TGTCAGCAAC       |
| RLTR9A-3    | chr6:131950772-131951050      | CTGCTAGCTTGTTC<br>CACAGTCTGT         | CGAAGCTTTGGTCATA<br>TGTAGCTACCAC     |
| RLTR9B2-1   | chr9:35857019-35857453        | TATGCTAGCAGGGAG<br>GAATTGTAGCCT      | TGAAGCTTGTGTAAGC<br>TGTGACCACC       |
| RLTR9B2-2   | chr15:46685298-46685715       | GATGCTAGCTAGGTA<br>TGGGTGTAGCCT      | GTAAGCTTATATGAAG<br>CCGCCGAGG        |
| RLTR9B2-3   | chr9:3876631-3877013          | TAGCTAGCAACCTCC<br>CTCAGCTTTGAAG     | TGAAGCTTACCACCTG<br>TAACTGCCTG       |
| RLTR9D-4    | chr13:51700207-51700525       | GTCGCTAGCGACAAA<br>AATCTGTAGCCTC     | TCGAAGCTTCTGGGG<br>ATTTTTGTAGC       |
| RLTR9D-5    | chr4:61781034-61781409        | GTCGCTAGCCTAATA<br>AACTGTAGCCTCC     | GTAAGCTTGGTATTC<br>TGGAAGGCAGG       |
| RLTR9D-6    | chr19:61262917-61263304       | AATGCTAGCCACCAT<br>ATTTTGTAGCCTCCC   | CAGAAGCTTATATTGT<br>AACTGTAAGCCACCCG |
| RLTR9D-8    | chr7:93238995-93239268        | TGGCTAGCTATAATG<br>CTGTAGCCTCC       | TGCAAGCTTCCAATCT<br>GTTGTAGTAAGC     |
| RLTR9E-1    | chr11:39621930-39622324       | ATCTAGCTAGCTGTAA<br>CCTCCCCAGATC     | GTACCAAGCTTCACTG<br>TGTTGGAAACCC     |
| RLTR9E-3    | chr8:5490592-5490910          | GTCTAGCTAGCTGTA<br>ATCTTCCCAGCCTT    | TACCAAGCTTCAGGGT<br>TTACCTGAAAGGG    |
| RLTR9E-4    | chr2:134325117-134325493      | ATCTAGCTAGCTGACT<br>CTTTGTGGCCTTC    | TTACAAGCTTAAGAGC<br>TGCAGCCATCCA     |
| RLTR9E-6    | chrX:33090390-33090747        | TACTAGCTAGCGGAA<br>AATGTGTAACCTCCC   | TACCCAAGCTTTTTGC<br>CAAATTGTTGAGGC   |
| RLTR13D6-2  | chr15:45939533-45940436       | ATCTAGCTAGCTGCTA<br>CATCCACTCCAGT    | ATCCCAAGCTTTGCCA<br>CAGACTAAACTCT    |
| RLTR13D6-3  | chr3:157955259-157956103      | CTAGCTAGCGCTACA<br>TCCACTCCAGTG      | ATTAAGCTTAAGGTG<br>CAGCTGCCATGG      |
| RLTR13D6-4  | chr10:129263868-<br>129264692 | ATCTAGCTAGCAGTCT<br>GCTTGGTAGACCTA   | ATCCCAAGCTTTGCCA<br>CAGTCTAACCTTTA   |
| RLTR13D6-5  | chrX:23517523-23518460        | ATCTAGCTAGCTGCTA<br>CATCCACTCCAGT    | ATCCCAAGCTTTAGTT<br>TCAATGCCATGGAC   |
| RLTR13D6-6  | chrX:123868460-123869422      | ATCTAGCTAGCTGCTA<br>CATCCACACCAGTA   | TATACAAGCTTGTAAAT<br>GCCGCAGACCGA    |
| RLTR13D6-7  | chr7:24805782-24806740        | GTCTAGCTAGCGGTG<br>AATTATTGCTACATCC  | ATACCAAGCTTTTTGC<br>CATGGACTGGTCT    |
| RLTR13D6-9  | chr8:19233601-19234552        | AGCTAGCTAGCTACT<br>ACATCCACTCCAATAG  | TATACAAGCTTTGCTG<br>CAGATGGACCTCA    |
| RLTR13D6-10 | chrX:18352105-18353054        | ATCTAGCTAGCTGCTA                     | ATCCCAAGCTTTGCTA                     |

|            |                          |                                    |                                   |
|------------|--------------------------|------------------------------------|-----------------------------------|
|            |                          | CATCCACTCCACTA                     | CAGATAGTCCTCAGT                   |
| RLTR13D1-1 | chr4:121503035-121504104 | CTCTAGCTAGCCTTT<br>TTTAGTGCTAGGCAC | TACAAGCTTTGCCACA<br>GACCCTCTTGATT |
| RLTR13D1-3 | chr12:31859774-31860726  | CTAGCTAGCTGCTAT<br>GCACACTCCAGT    | TACAAGCTTAGTGTTG<br>CTGCAGACCGT   |

**Supplementary Table 6A: Motifs in TE sequences that were targeted for site-directed mutagenesis**

| TE-ID     | Genomic coordinates        | TF    | Relative Motif Start | Motif Score | Motif Strand | Motif        |
|-----------|----------------------------|-------|----------------------|-------------|--------------|--------------|
| RLTR9A-1  | chr4:82903264-82903586(+)  | Oct4  | 151                  | 4.69        | +            | TTTGCAACATAA |
| RLTR9B2-1 | chr16:13748942-13749321(+) | Esrrb | 32                   | 5.77        | +            | TGACCTTGCT   |
| RLTR9B2-1 | chr16:13748942-13749321(+) | Klf4  | 64                   | 5.65        | +            | GGGGTGGAGC   |
| RLTR9B2-1 | chr16:13748942-13749321(+) | Sox2  | 92                   | 5.11        | -            | CTATTGTTCT   |
| RLTR9D-2  | chr13:19722847-19723141(-) | Esrrb | 40                   | 5.77        | +            | TGACCTTGCT   |
| RLTR9D-2  | chr13:19722847-19723141(-) | Klf4  | 72                   | 5.92        | +            | AGGGTGGAGC   |
| RLTR9D-2  | chr13:19722847-19723141(-) | Sox2  | 100                  | 5.11        | -            | CTATTGTTCT   |
| RLTR9E-2  | chr13:86484962-86485391(+) | Esrrb | 38                   | 5.77        | +            | TGACCTTGCT   |
| RLTR9E-2  | chr13:86484962-86485391(+) | Klf4  | 70                   | 5.92        | +            | AGGGTGGAGC   |
| RLTR9E-2  | chr13:86484962-86485391(+) | Sox2  | 98                   | 5.11        | -            | CTATTGTTCT   |
| RLTR9E-2  | chr13:86484962-86485391(+) | Klf4  | 163                  | 5.78        | -            | CCCCACCCC    |

**Supplementary Table 6B: Primers for mutating TF motifs (Supp. Table 11A) in four genomic TEs, for mutagenesis luciferase assay**

| TE        | Mutant | Forward primer                               | Reverse primer                             |
|-----------|--------|----------------------------------------------|--------------------------------------------|
| RLTR9A-1  | mutO   | cgctgagcttactttTGacataatccagct<br>gaaac      | gttcagctggattatgtCCAaaagtaagctcagc<br>g    |
| RLTR9B2-1 | mutE1  | gtaggctggctttTaGAttgctgccactgagt<br>at       | atactcagtgccagcaaTCtAaaagccagccta<br>c     |
| RLTR9B2-1 | mutK2  | gtatgagaccacctgCAAtAgagccttccg<br>acttag     | ctaagtcggaaggctcTaTTGcaggtggctca<br>tac    |
| RLTR9B2-1 | mutS   | gcaacgcggaagacagaCcCctagagcc<br>atctaag      | cttagatggctctaGGgGctgtcttccgcgttgc         |
| RLTR9D-2  | mutE1  | ctgatccagactttTaGAttgctgcctcttaga<br>agg     | ccttctaagaggcagcaaTCtAaaagtctggat<br>cag   |
| RLTR9D-2  | mutK1  | gaaggagataacctagAAtAgaAccttctg<br>accatgat   | atcatggtcagaaggTtcTaTTctaggtatctcc<br>ttc  |
| RLTR9D-2  | mutS1  | ccagcaggtgacagaaACctagagccatc<br>atggt       | accatgatggctctaGGTtctgtcacctgctgg          |
| RLTR9E-2  | mutE1  | ctgatccagactttTaGAttgctgccactaag<br>aagg     | ccttcttagtgccagcaaTCtAaaagtctggatc<br>ag   |
| RLTR9E-2  | mutK1  | agaaggagattacctagAAtAgagcattcc<br>aacctagatg | catctaggttgaatgctcTaTTctaggtaatctc<br>ctct |
| RLTR9E-2  | mutS1  | gtggcaggtggcagaaACctagagccatct<br>aggt       | acctagatggctctaGGTtctgccacctgcca<br>c      |
| RLTR9E-2  | mutK2  | tccagaataactgggCAAtgggAggggga<br>gggtg       | cacctccccTcccaTTGcccagttattctgg<br>a       |

**Supplementary Table 7: Genomic coordinates of TEs cis-regulatory elements (CREs) that were selected and tested using the CRE-seq assay.**

| <u>TE-CRE type</u> | <u>TE subfamily</u>      | <u>Genomic coordinates of TE-CRE</u> |
|--------------------|--------------------------|--------------------------------------|
| EKS motif-module   | RLTR9B2                  | chr19:18785589-18785672              |
|                    | RLTR9B2                  | chr5:30962718-30962801               |
|                    | RLTR9B2                  | chr11:88892039-88892122              |
|                    | RLTR9B2                  | chr14:10074701-10074784              |
|                    | RLTR9B2                  | chr16:13748971-13749054              |
|                    | RLTR9B2                  | chr19:5224732-5224815                |
|                    | RLTR9D                   | chr13:19723022-19723105              |
|                    | RLTR9D                   | chr16:13976704-13976787              |
|                    | RLTR9D                   | chr17:90333552-90333635              |
|                    | RLTR9D                   | chr13:28052361-28052444              |
|                    | RLTR9D                   | chr1:4792713-4792796                 |
|                    | RLTR9E                   | chr10:95182288-95182371              |
|                    | RLTR9E                   | chr18:30534784-30534867              |
|                    | RLTR9E                   | chr7:18586744-18586827               |
|                    | RLTR9E                   | chr13:86484998-86485081              |
|                    | RLTR9E                   | chr13:91008908-91008991              |
|                    | RLTR9E                   | chr19:11374150-11374233              |
|                    | RLTR9E                   | chr4:19064832-19064915               |
| RLTR9E             | chr7:92253113-92253196   |                                      |
| Negative control   | RLTR9B2                  | chr10:51536510-51536593              |
|                    | RLTR9B2                  | chr1:101530178-101530261             |
|                    | RLTR9B2                  | chr17:74402694-74402777              |
|                    | RLTR9B2                  | chr3:137937614-137937697             |
|                    | RLTR9D                   | chr10:114651926-114652009            |
|                    | RLTR9D                   | chr10:14588925-14589008              |
|                    | RLTR9D                   | chr12:120319115-120319198            |
|                    | RLTR9D                   | chr8:3890885-3890968                 |
|                    | RLTR9E                   | chr10:129442561-129442644            |
|                    | RLTR9E                   | chr1:10161277-10161360               |
|                    | RLTR9E                   | chr1:123645300-123645383             |
|                    | RLTR9E                   | chr7:111161864-111161947             |
| RLTR9E             | chr9:100493278-100493361 |                                      |

**Supplementary Table 8: Mutations in EKS motifs in TE-CREs**

| <u>Transcription Factor</u> | <u>Wild type motif</u> | <u>Mutated motif</u> |
|-----------------------------|------------------------|----------------------|
|-----------------------------|------------------------|----------------------|

|       |                 |                 |
|-------|-----------------|-----------------|
| Esrrb | GCAGCAAGGTCA    | GCAGCAGTCTCA    |
| Klf4  | AGGGTGGAGC      | ACAATGGAGC      |
| Sox2  | CTATTGTTCTGTCAC | CTAGGTTTCTGCCAC |

**Supplementary Table 9: RepBase-consensus sequences synthesized. Nucleotides in lowercase represents positions where the RepBase-consensus was 'N' and we replaced it with the most frequent nucleotide at that position from the genomic TEs of that subfamily**

| TE Subfamily | RepBase-consensus sequence                                                                                                                                                                                                                                                                                                                                                                                                                                |
|--------------|-----------------------------------------------------------------------------------------------------------------------------------------------------------------------------------------------------------------------------------------------------------------------------------------------------------------------------------------------------------------------------------------------------------------------------------------------------------|
| RLTR9A       | TGTGCCCTTCCCCAGCCTTGAGCAGGCTGAATCAGACCTTGTTTTGCCACAGTCGG<br>CTAGCCCACCTAGGGTGGAGTCTTCCGACCTAGGTAAAGTCTATTGTCCTGCCACATCT<br>GCAGCTTCTGCAAGAAGCCACTACCTGCTGAGCAGCTGAGCTTGTTTTCTGACGAG<br>ATCCTGACAAAGCAAGAGATCCTGGCATAGTGGGGGATGGGTTCCTTAAAA<br>GTTTCACTCAAGAATTAACATTGAGCCTTGATCAGAGAACTTTGCTTGGCTCGTTA<br>TTTCTCTCGCCGTCCTTCCCATCCATCCCCAGCTTTCCTTTCAGGAACCCAGTAACCCGT<br>GGCTGCTGGCGGCTACA                                                               |
| RLTR9B2      | TGTAGCCTCCCCAGCCTTGAAGCAGGCTGATTCAGACCTTGCTGCCACTGAGAATGA<br>GACCACCTGGGGTGGAGCCTTCCGACCTAGATGGCTCTATTGTTCTGTCACCTGCTGC<br>TGCTTTCTCCAAGACGCTGCTACCTGCTGAGAGGCTGAACCTGCCTTCTGAGAAATT<br>CCGGAGACTGACACCTTACTGCCAACTAGTGCTGTCAGACTGATTGCTTACAGGCTG<br>GCGACAGGCATCAAGAGTGGATCGGCGGGGGATGGGCCTCCCCCTTTATAAGCAC<br>AGACTCTTAGTAACTTTGGGGCCTTGATCAGAAACATGTCTTGGCCTCCATTATTTCTC<br>TCGCCGTTTCTCCCATACAGCTCCGGCCTCCCACTCAGGAACCCAGTTAGTGTGGCC<br>GCAGGCGGCTACA |
| RLTR9D       | TGTAGCCTCCCTCAGCCTTGAAGCAGGCTGATCCAGACTTTGACCTTGCTGCCACTGA<br>GAAGGAGATTACCTAGGGTGGAGCCTTCCGACCTAGATGGCTCTATTGTTCTGTCACC<br>TGCCACTGCTTTCTCCAAGACACTGCTACCTGCTGAGAGGCCCTGAGACATTCCGG<br>AGGCACATCCTATCCTGCACATCGCCTACAGGCTGGCTCCAGGCACCAAGAATGGACT<br>GGCGGGGATGGGCCTTCCCCCTTTATAAGCACAGTCTCTTAGTAACTCGCGGGCCTT<br>GAACAGAAAATTGCTTGGCTTCAATTCTCTCGCCGTCTAAGTCTTTTCAGCCCCA<br>GCCTGCCTCCAGGTGTACCCGGTTCATGTAGGCCGCGGGCCGGCTTACAACA                        |
| RLTR9E       | TGTAACCTCCCCAGCCTGAAGCAGGCTGAGCCAGACCTTGACCTTGCTGCCACTAAG<br>GAGATTACCTAGGGTGGAGCCTTCTCCCTAGATCACTCTATTGTTTCAGCCACTGCCGC<br>TGCTCCCCTTCAAGATACTGCTACCTGCTGGGAGGCCGCCGAGCTATTCCGGAGACTA<br>CACCTATCCTGCACGTGCTCACCTGCAGCTGGTTCCAGGCTCCAAGGATGAATTGGC<br>GGGAATGGGCCTTCCCCCTTTATAAGCGCAGTCCGCCATTAACATTTGAGCCTT<br>GATCAGGAACCTTGCTTGGCTCCATTTTTCTCTCGACCGCCTAGTTCCCTCTTTTCA<br>GCCCCGGCCTGCCTCCAGGTGAACCCGGTCCATGTGAGCCGAGGCCGGCTCCAA<br>CA                |

**Supplementary Table 10: Motifs in RepBase-consensus sequences**

| TE Subfamily | Length of RepBase-TE-Consensus (bp) | Motif Start | Motif Stop | Motif Orientation | TF    | Motif Score | P-value |
|--------------|-------------------------------------|-------------|------------|-------------------|-------|-------------|---------|
| RLTR9A       | 368                                 | 70          | 80         | +                 | Klf4  | 3.18        | -9.68   |
| RLTR9A       | 368                                 | 99          | 114        | +                 | Sox2  | 3.71        | -10.62  |
| RLTR9B2      | 420                                 | 35          | 47         | -                 | Esrrb | 1.96        | -7.59   |
| RLTR9B2      | 420                                 | 67          | 77         | +                 | Klf4  | 3.80        | -10.66  |
| RLTR9B2      | 420                                 | 95          | 110        | +                 | Sox2  | 3.13        | -9.34   |

|        |     |    |     |   |       |      |        |
|--------|-----|----|-----|---|-------|------|--------|
| RLTR9E | 409 | 34 | 46  | - | Esrrb | 3.10 | -9.34  |
| RLTR9E | 409 | 40 | 52  | - | Esrrb | 4.07 | -11.15 |
| RLTR9E | 409 | 69 | 79  | + | Klf4  | 3.81 | -10.68 |
| RLTR9E | 409 | 97 | 112 | + | Sox2  | 2.45 | -8.03  |

**Supplementary Table 11: Primers for mutating TF motifs in three RepBase-consensus sequences, for the mutagenesis experiment**

| TE Subfamily | Mutant | Forward primer                      | Reverse Primer                      |
|--------------|--------|-------------------------------------|-------------------------------------|
| RLTR9B2      | mutE   | tctcagtggcagcaaTCtAtgaatcagcctgcttc | gaagcaggctgattcaTaGAttgctgccactgaga |
| RLTR9B2      | mutK   | agaatgagaccacctggAAtAgagcctccgaccta | taggtcggaggctcTaTTccaggtggctcattct  |
| RLTR9B2      | mutS   | gacctagatggctctaGATttctgtcacctgctg  | cagcaggtgacagaaATCtagagccatctaggtc  |
| RLTR9D       | mutE   | ggctgattccagacttTaGAttgctgccactgaga | tctcagtggcagcaaTCtAaaagtctggatcagcc |
| RLTR9D       | mutK   | gaaggagattacctagAAtAgagcctccgacc    | ggcggaggctcTaTTctaggtaatctcctc      |
| RLTR9D       | mutS   | gacctagatggctctaGATttctgtcacctgccac | gtggcaggtgacagaaATCtagagccatctaggtc |
| RLTR9E       | mutE   | gctgagccagacctTaGAttgctgccactaag    | cttagtggcagcaaTCtAaaggtctggctcagc   |
| RLTR9E       | mutK   | aaggagattacctagAAtggagccttcctccta   | tagggaggaaggctccaTTctaggtaatctcct   |
| RLTR9E       | mutS   | cctagatcactctaGATttcagccactgccgct   | agcggcagtggctgaaATCtagagtgatctagg   |

**Supplementary Table 12: Primers used for qRT-PCR to quantitate the change in expression level after CRISPR-mediated deletion of RLTR9E in Akap12 intron.**

| Gene Name     | Forward Primer        | Reverse Primer       |
|---------------|-----------------------|----------------------|
| <i>Gapdh</i>  | aggtcgggtgtaacggatttg | ggggctcgtgatggcaaca  |
| <i>Akap12</i> | ctacaggagccaaagggaga  | tttggctcaaggctccaac  |
| <i>Lrp11</i>  | ggagccatgggattaaatga  | ctcgtctctgggtgggatac |
| <i>Nup43</i>  | cctgcagaccacagagacct  | tcaaaccctccgtcagaatc |
